# Supplementary material for: Regulation of YAP Promotor Accessibility in Endothelial Mechanotransduction
Source: PubMed Central journal article supplement — Arterioscler Thromb Vasc Biol. 2024 Feb 1;44(3):666–89. doi: 10.1161/ATVBAHA.123.320300 (PMC10880945; doi:10.1161/atvbaha.123.320300), 2024-02-01

# Full unedited, uncropped membranes: Mannion et al

## Full unedited gel for Fig3A

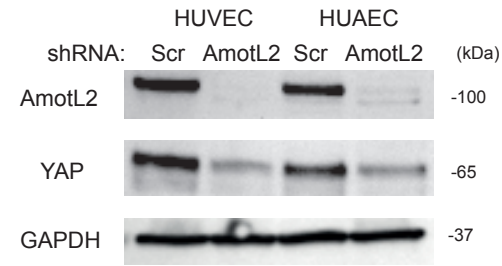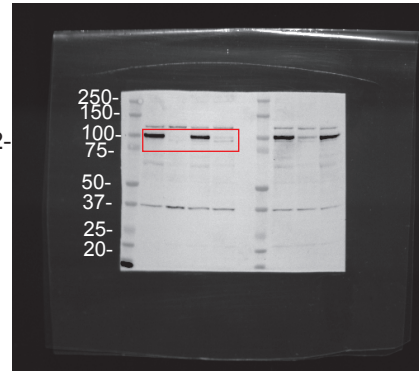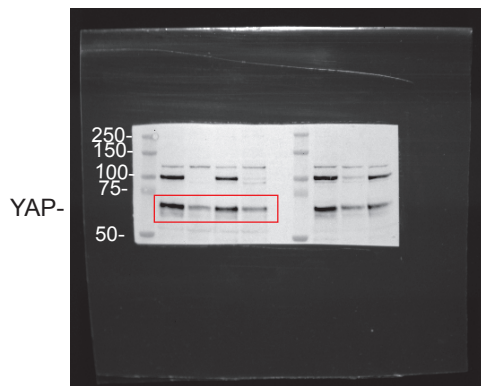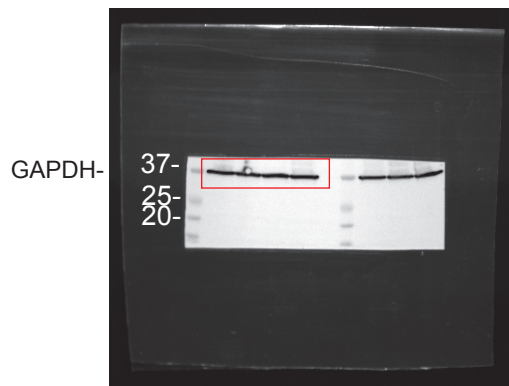

## Full unedited gel for Fig3E

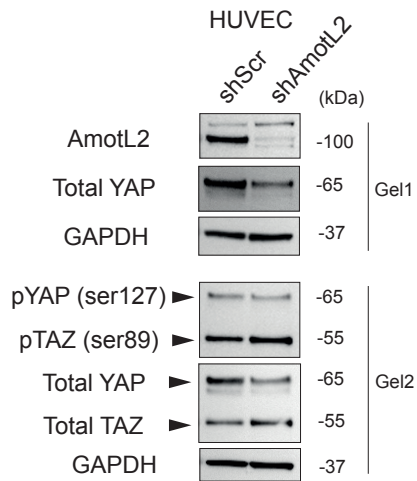

### Gel 1

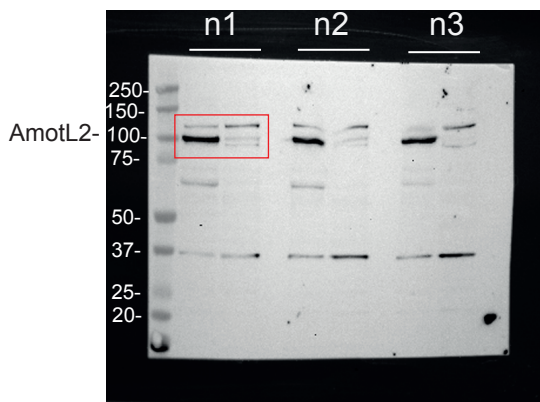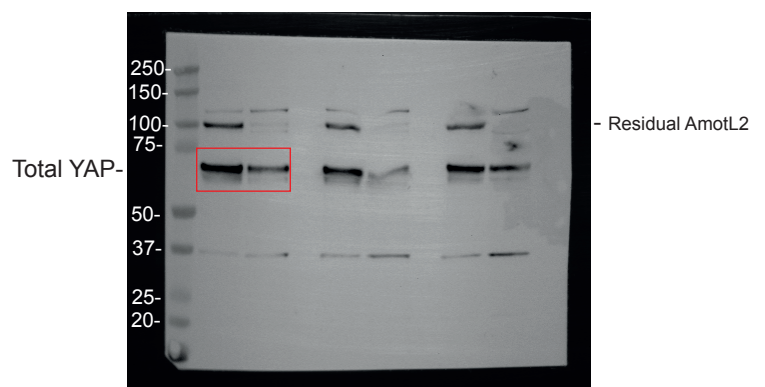

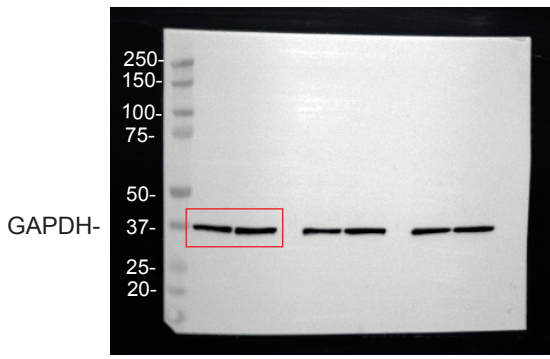

Gel 2 - The same samples shown in gel 1 were run on another gel at the same time

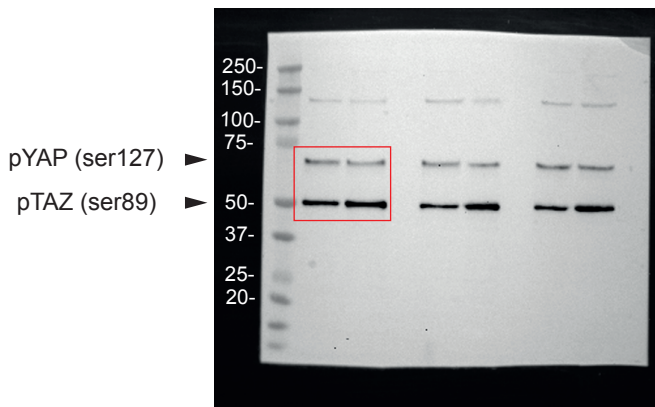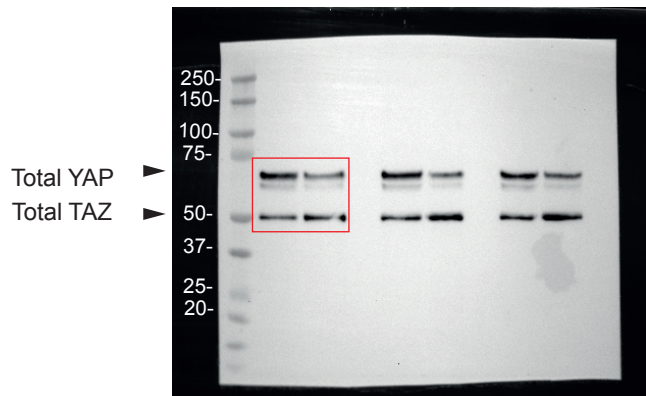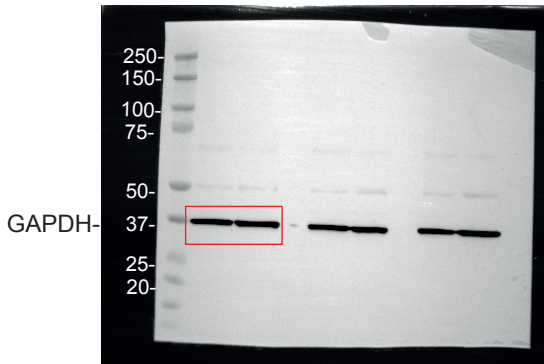

Full unedited gel for Fig3G

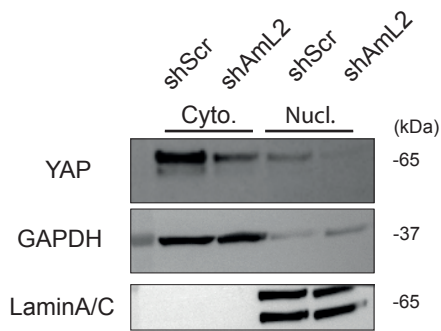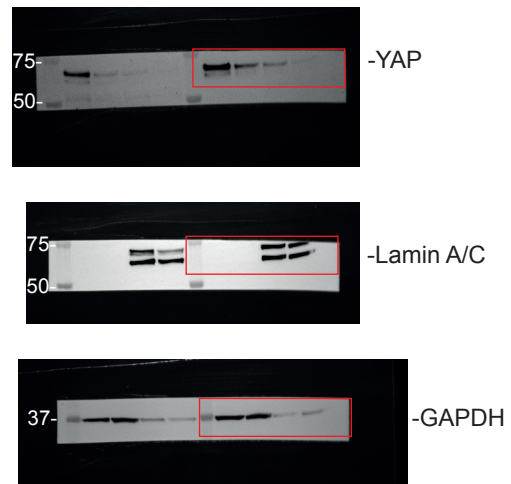

# Full unedited gel for Fig4D

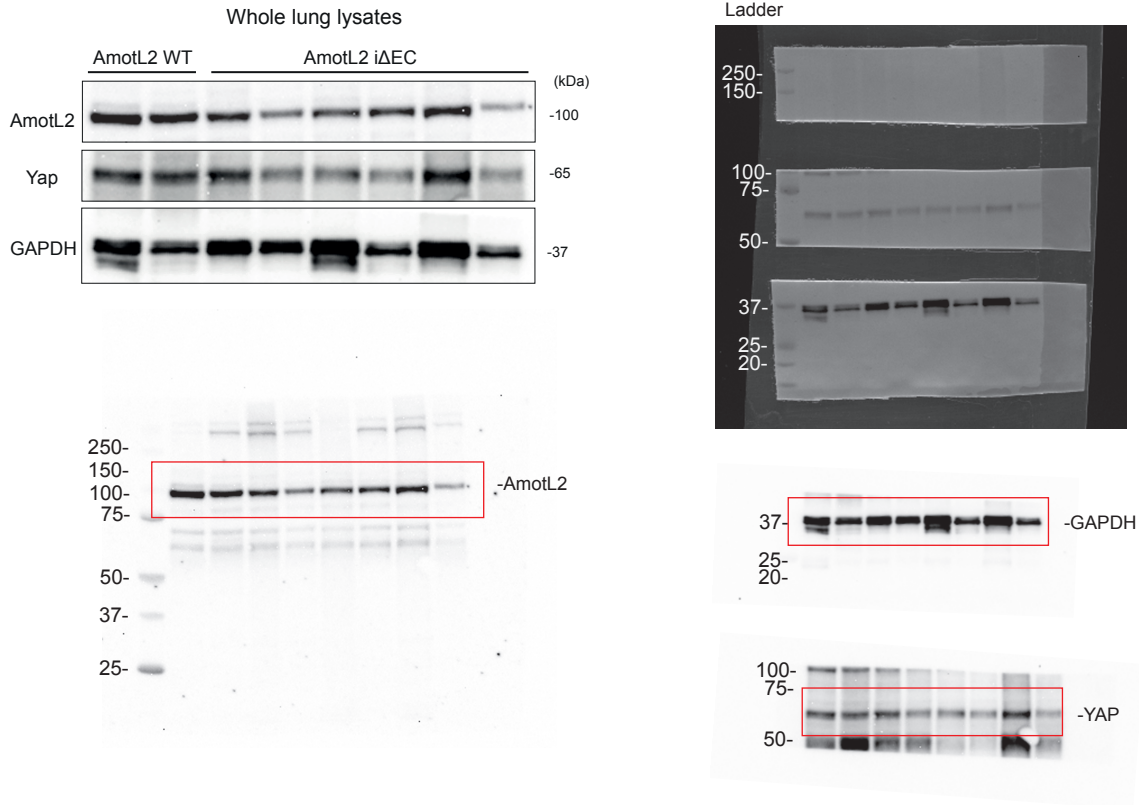

Fig4E and F - used for quantification as stated in the figure legend

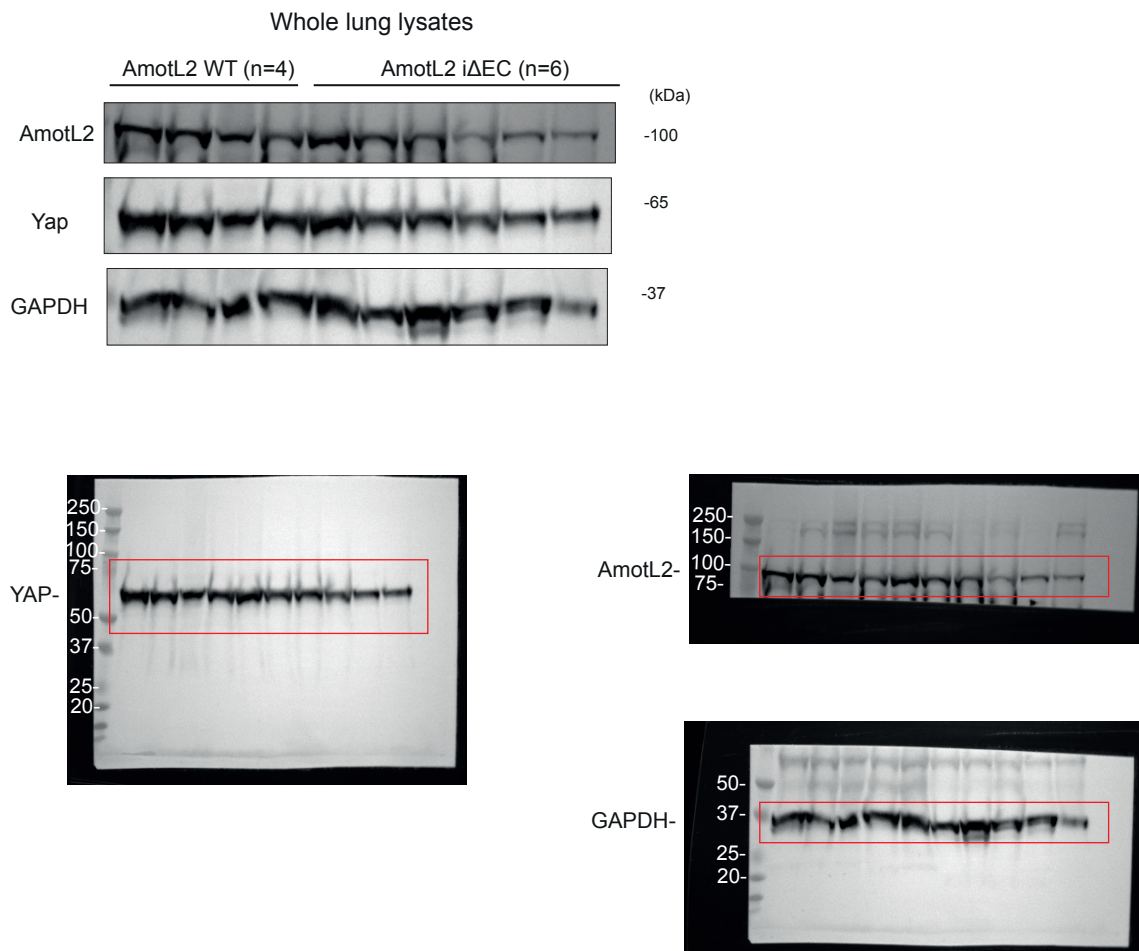

Full unedited gel for Fig7B

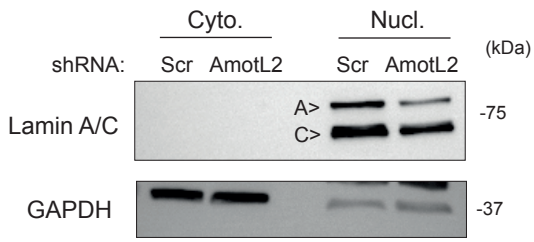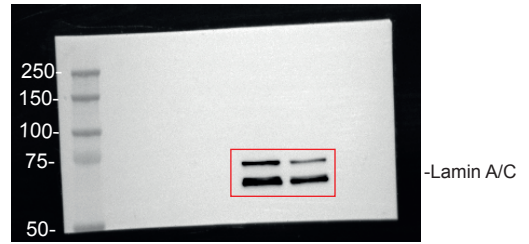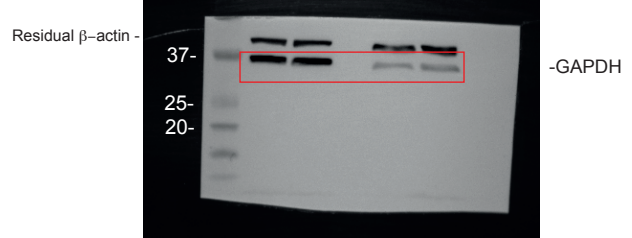

Full unedited gel for SuppFig3E

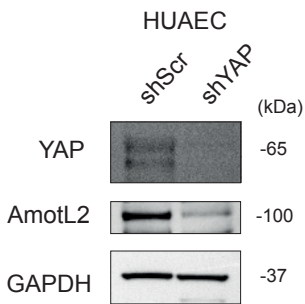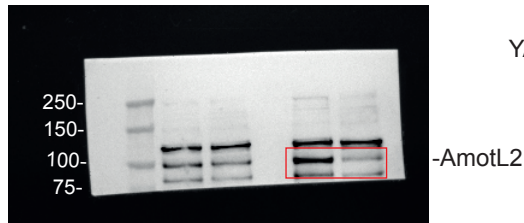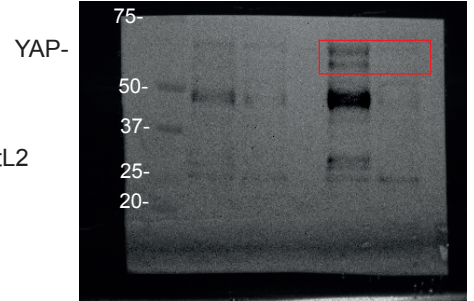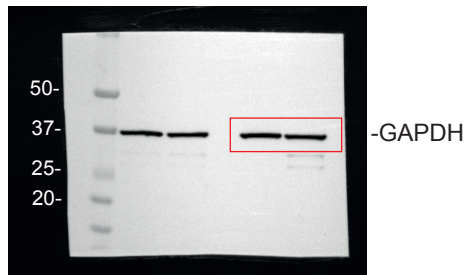

Full unedited gel for SuppFig3F

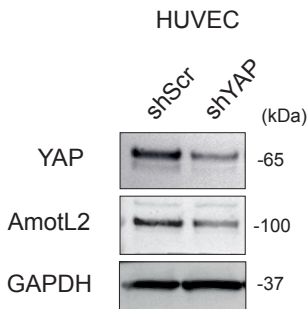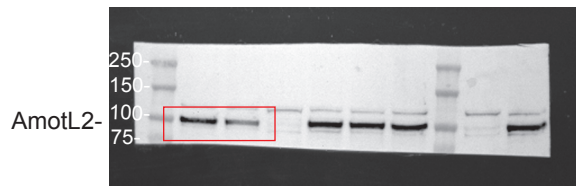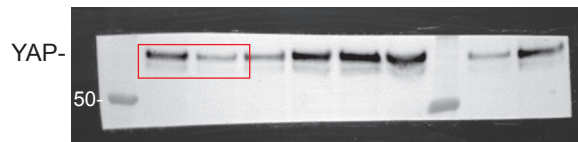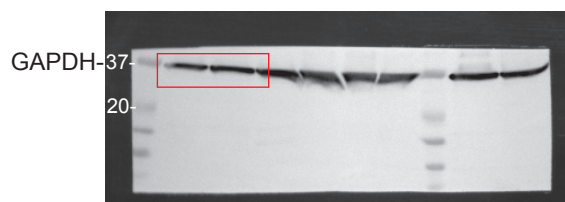

Full unedited gel for SuppFig3G

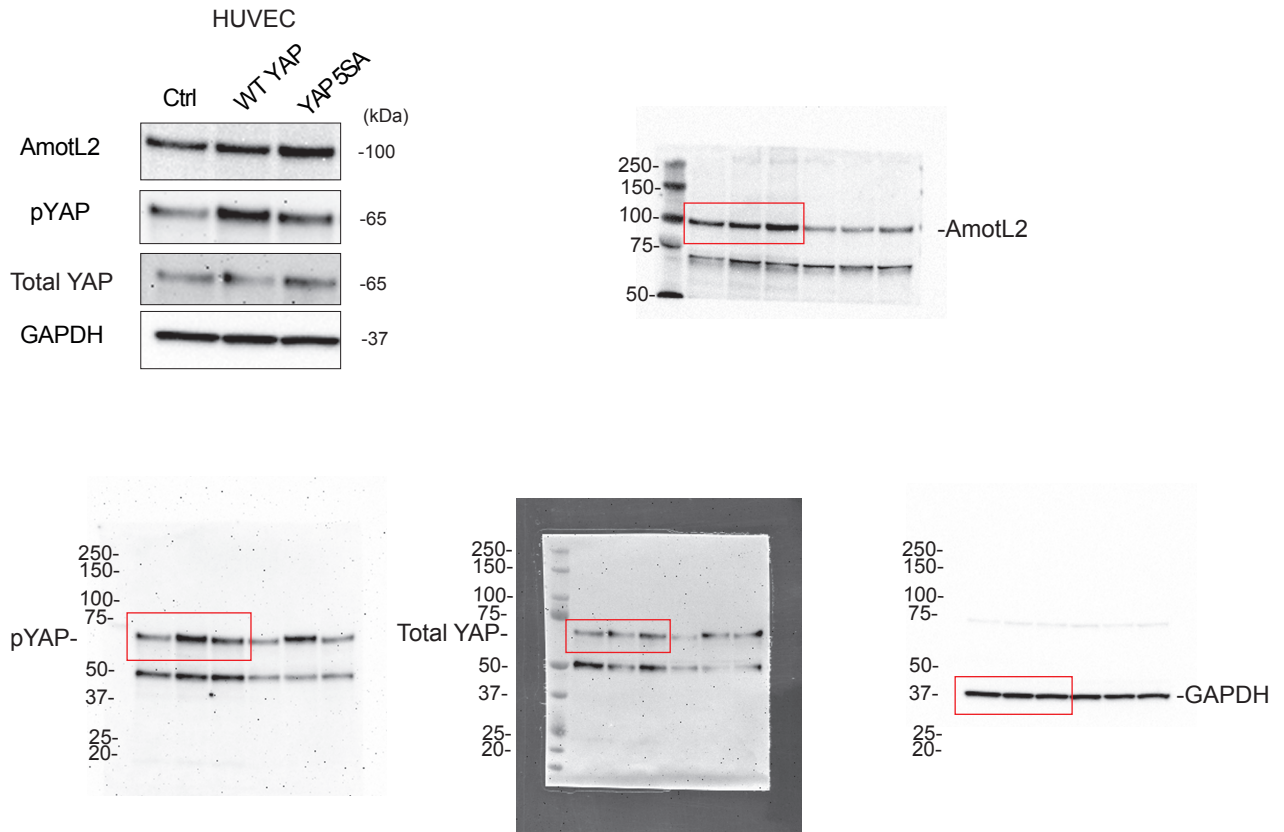

Full unedited gel for SuppFig5A

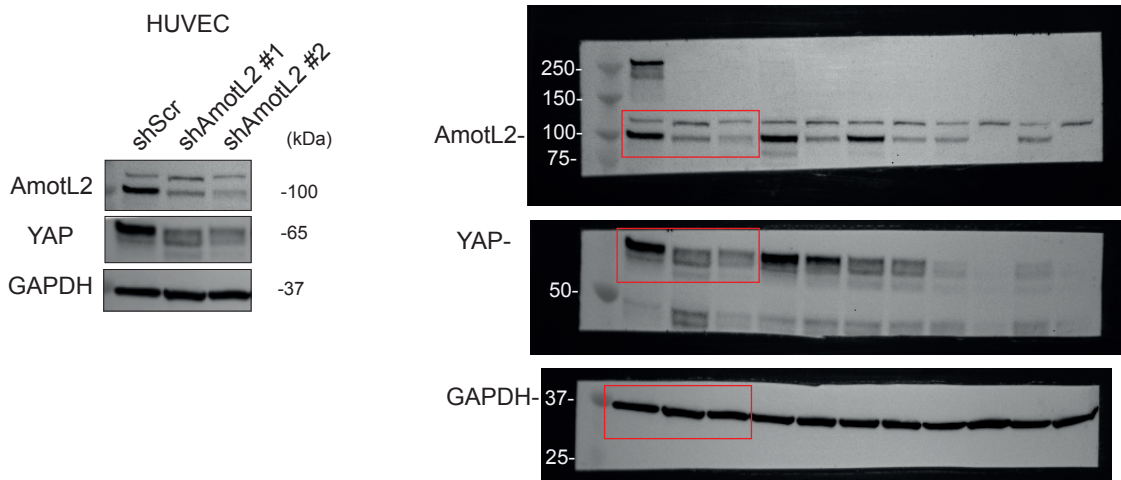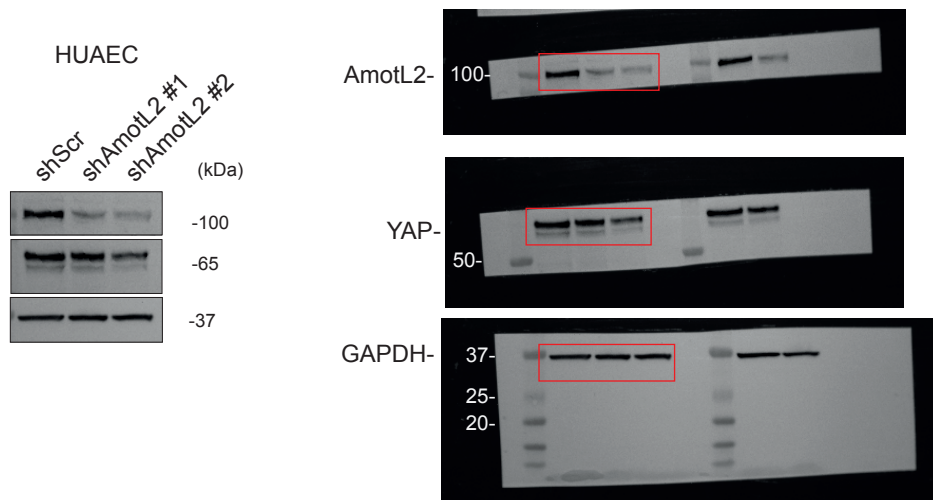

Full unedited gel for SuppFig5C

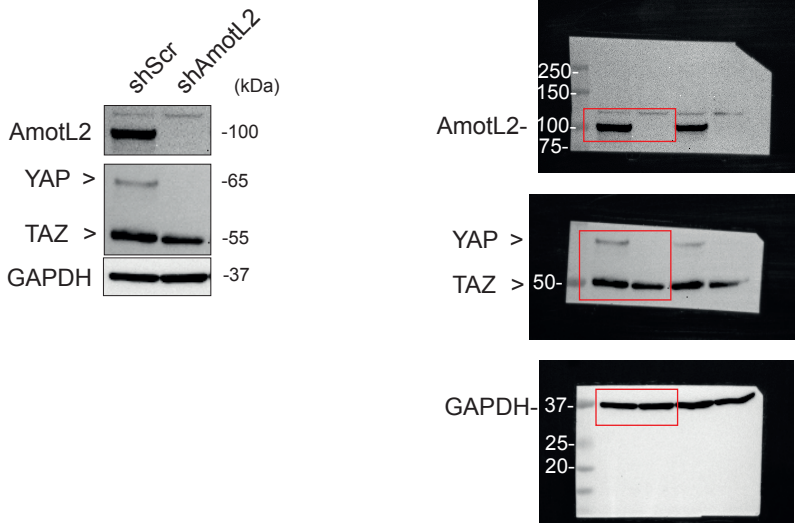

Full unedited gel for SuppFig11H - reprobbed membrane from SuppFig5C for FAK Y397

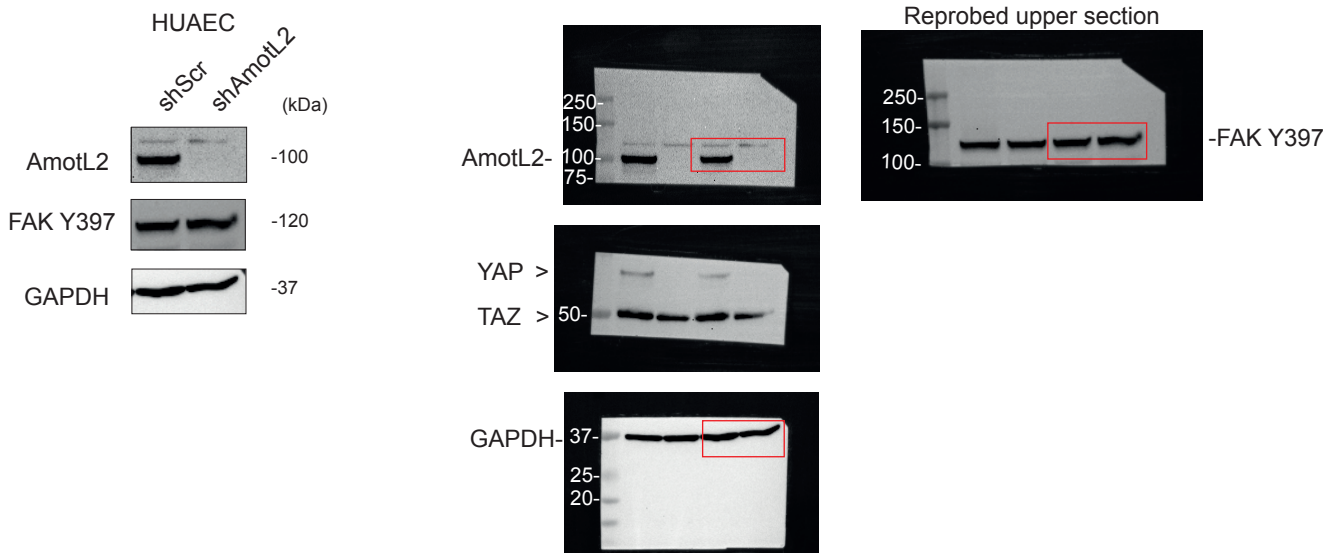

Full unedited gel for SuppFig11I

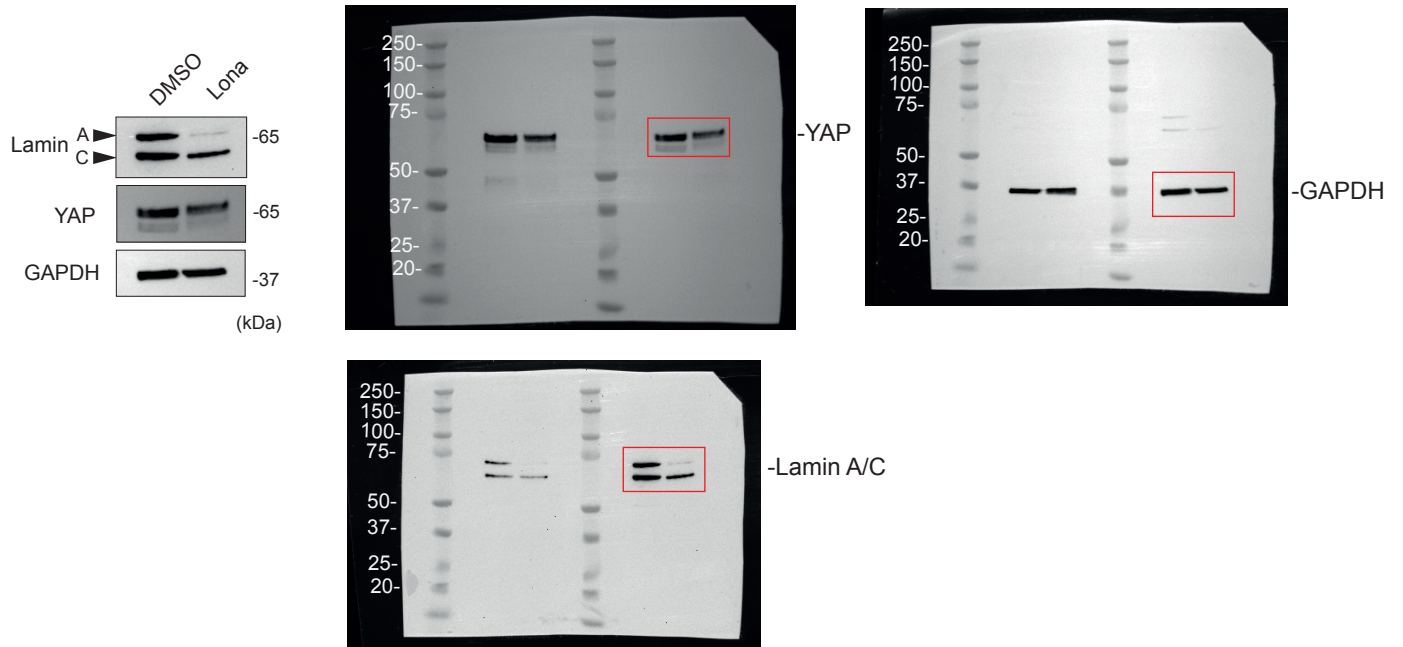

Supplement: atv-44-666-s002.pdf [file atv-44-666-s002.pdf]
