# Supplementary material for: Regulation of YAP Promotor Accessibility in Endothelial Mechanotransduction
Source: PubMed Central journal article supplement — Arterioscler Thromb Vasc Biol. 2024 Feb 1;44(3):666–89. doi: 10.1161/ATVBAHA.123.320300 (PMC10880945; doi:10.1161/atvbaha.123.320300), 2024-02-01
Supplement: atv-44-666-s001.pdf [file atv-44-666-s001.pdf]

# Supplementary Materials

## Regulation of YAP promotor Accessibility in Endothelial Mechanotransduction

### Authors

Aarren J. Mannion<sup>1,2\*</sup>, Honglei Zhao<sup>1</sup>, Yuanyuan Zhang<sup>1</sup>, Ylva von Wright<sup>3</sup>, Otto Bergman<sup>4</sup>, Joy Roy<sup>5,6</sup>, Pipsa Saharinen<sup>3,7</sup>, Lars Holmgren<sup>1\*</sup>

### Affiliations

1. Department of Oncology-Pathology, Karolinska Institute, Stockholm 171 64, Sweden
2. Department of Cell and Tissue Dynamics, Max Planck Institute of Molecular Biomedicine, Münster, Germany
3. Wihuri Research Institute, Biomedicum Helsinki, Finland
4. Department of Medicine, Karolinska Institute, Stockholm 171 64, Sweden
5. Department of Molecular Medicine and Surgery, Karolinska Institute, Stockholm 171 64, Sweden
6. Department of Vascular Surgery, Karolinska University Hospital, Stockholm 171 64, Sweden
7. Translational Cancer Medicine Program and Department of Biochemistry and Developmental Biology, University of Helsinki, Finland

\*Correspondence: [lars.holmgren@ki.se](mailto:lars.holmgren@ki.se), [aarren.mannion@ki.se](mailto:aarren.mannion@ki.se), [aarren.mannion@mpi-muenster.mpg.de](mailto:aarren.mannion@mpi-muenster.mpg.de)

### This file includes:

Figs. S1 to S11  
Tables S1 to S2  
Data S1 to S2  
Major resources table

# Supplemental Figure 1

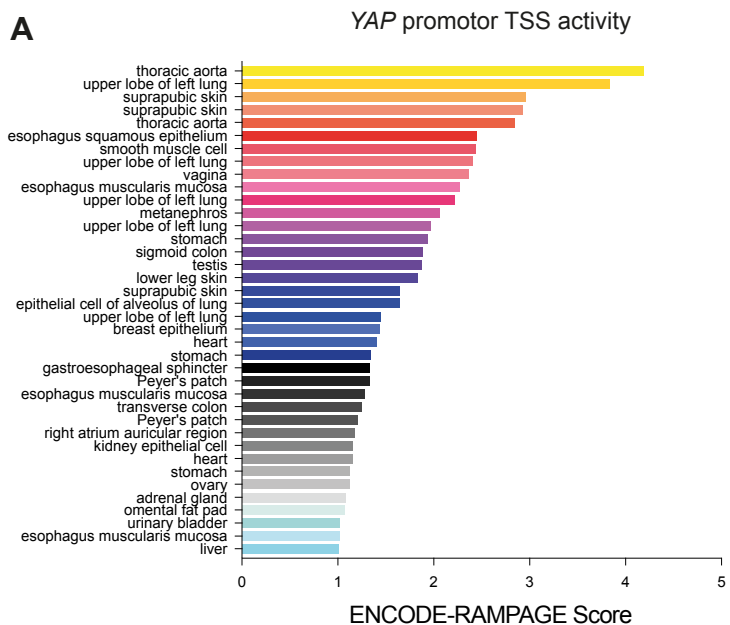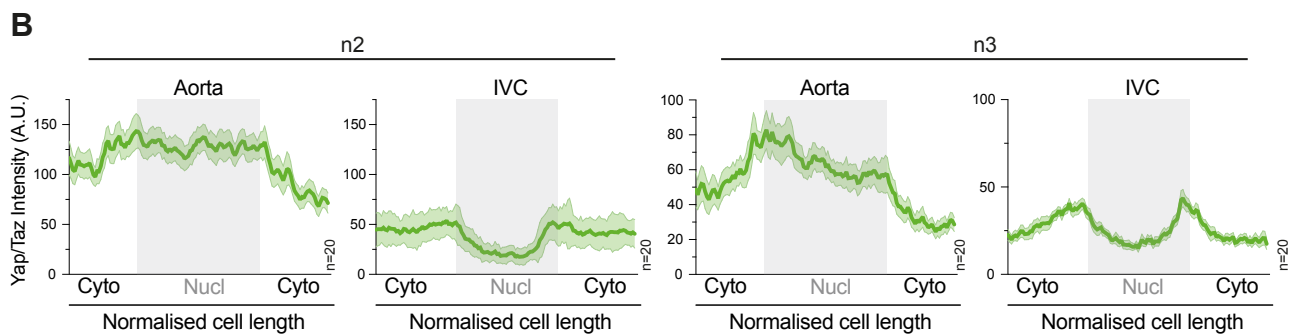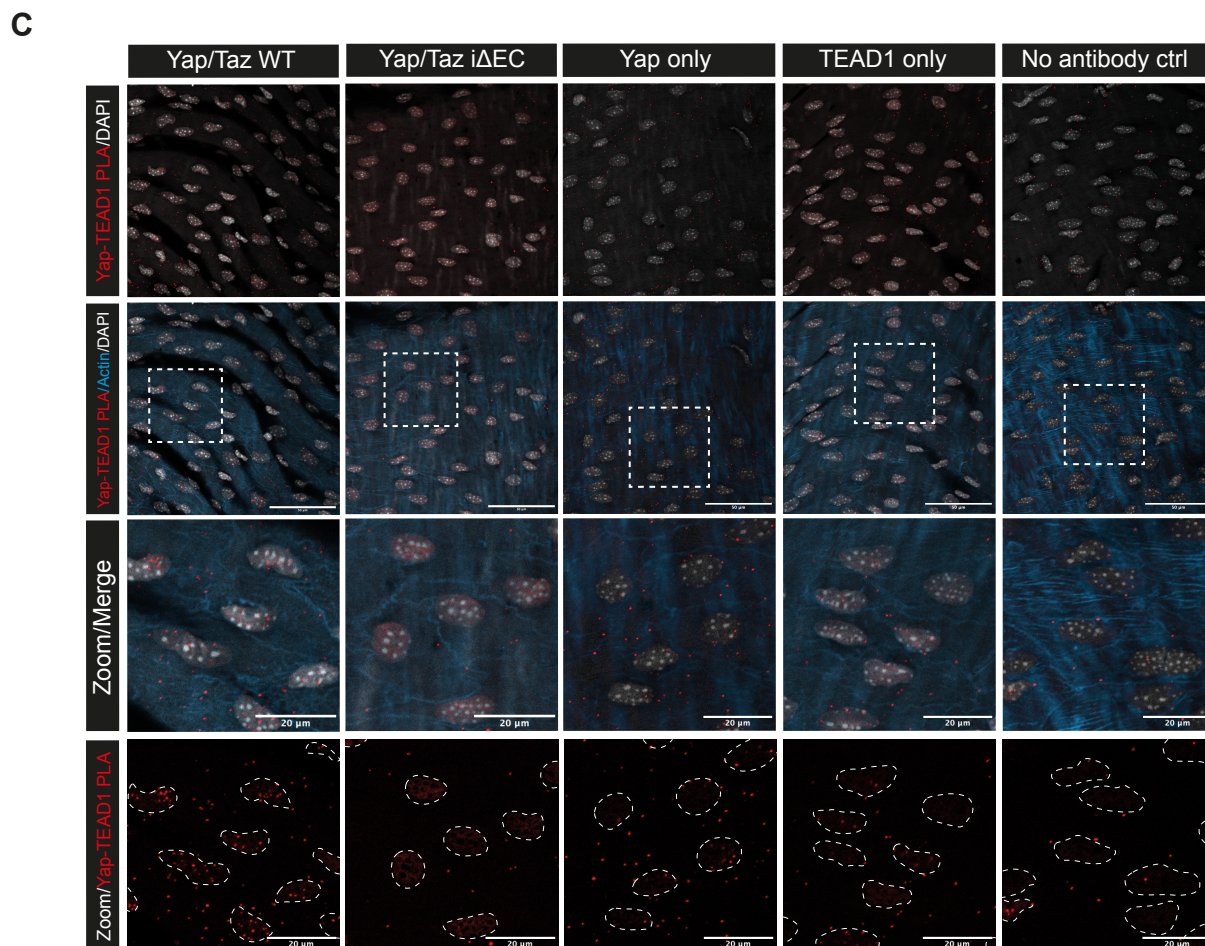

**Fig. S1.**

**A**, RNA Annotation and Mapping of Promoters for the analysis of Gene Expression (RAMPAGE) analysis of the transcriptional start sites (TSSs) of the YAP promotor, scored and ranked in descending order using SCREEN: Search Candidate cis-Regulatory Elements by ENCODE; <https://screen.wenglab.org/>. (19, 20) **B**, Quantification of nuclear and cytoplasmic staining of YAP/TAZ in the aorta and IVC. Histogram graph depicts the average intensity (mean $\pm$  s.e.m.) of  $n=20$  cells each from two independent animals labelled n2 and n3 (n1 is shown in Fig1b). A total of 60 cells per aorta or IVC were measured from  $n=3$  mice. **C**, Representative images of *ex vivo en face* aortic tissue of both YAP/TAZ WT ( $n=5$ ) and Yap/Taz i $\Delta$ EC ( $n=5$ ) inducible knockout mice, subjected to PLA showing the interaction between YAP and TEAD1 (indicated by red dots) and single antibody and no antibody controls. Quantification is shown in Fig1c. Nuclei are shown in grey and actin cytoskeleton in blue. In the bottom row, PLA dots (red) are shown with nuclei outlined by dashed white line. Scale bar, 50 $\mu$ m and 20 $\mu$ m, for 40x and indicated zoomed regions, respectively.

# Supplemental Figure 2

**A**

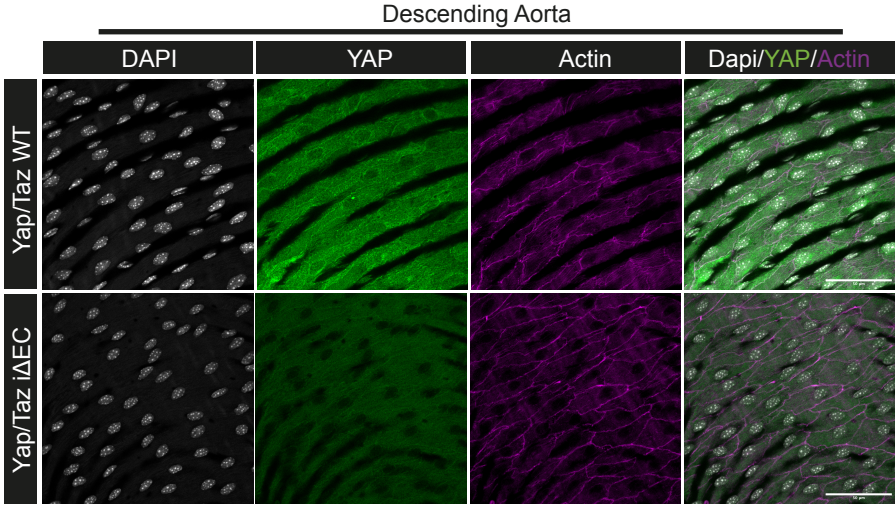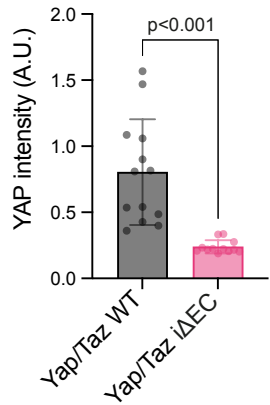

**B**

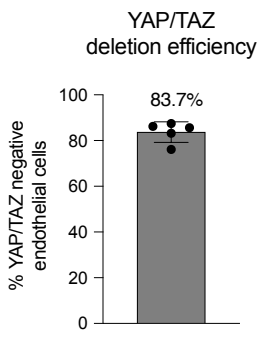

**Fig. S2.**

**A,** Representative images of *en face* staining of YAP in the descending aorta of both Yap/Taz WT and Yap/Taz i $\Delta$ EC mice,  $n=3$  per group. Nucleus (grey), Yap (green), Actin (magenta). Scale bar, 50 $\mu$ m. Bar graph indicates quantification of Yap fluorescent intensity, where each data point represents intensity profile from one image, 4-5 images/aorta ( $n=3$  mice/group) were analysed, mean $\pm$  s.d., Mann-Whitney). **B,** Quantification of YAP/TAZ efficiency of endothelial knockout by quantification of immunofluorescent staining of YAP/TAZ positive, VE-cadherin positive cells from images shown in Fig2A-B. Quantification were derived from  $n=5$  Yap/Taz i $\Delta$ EC mice.

### Supplemental Figure 3

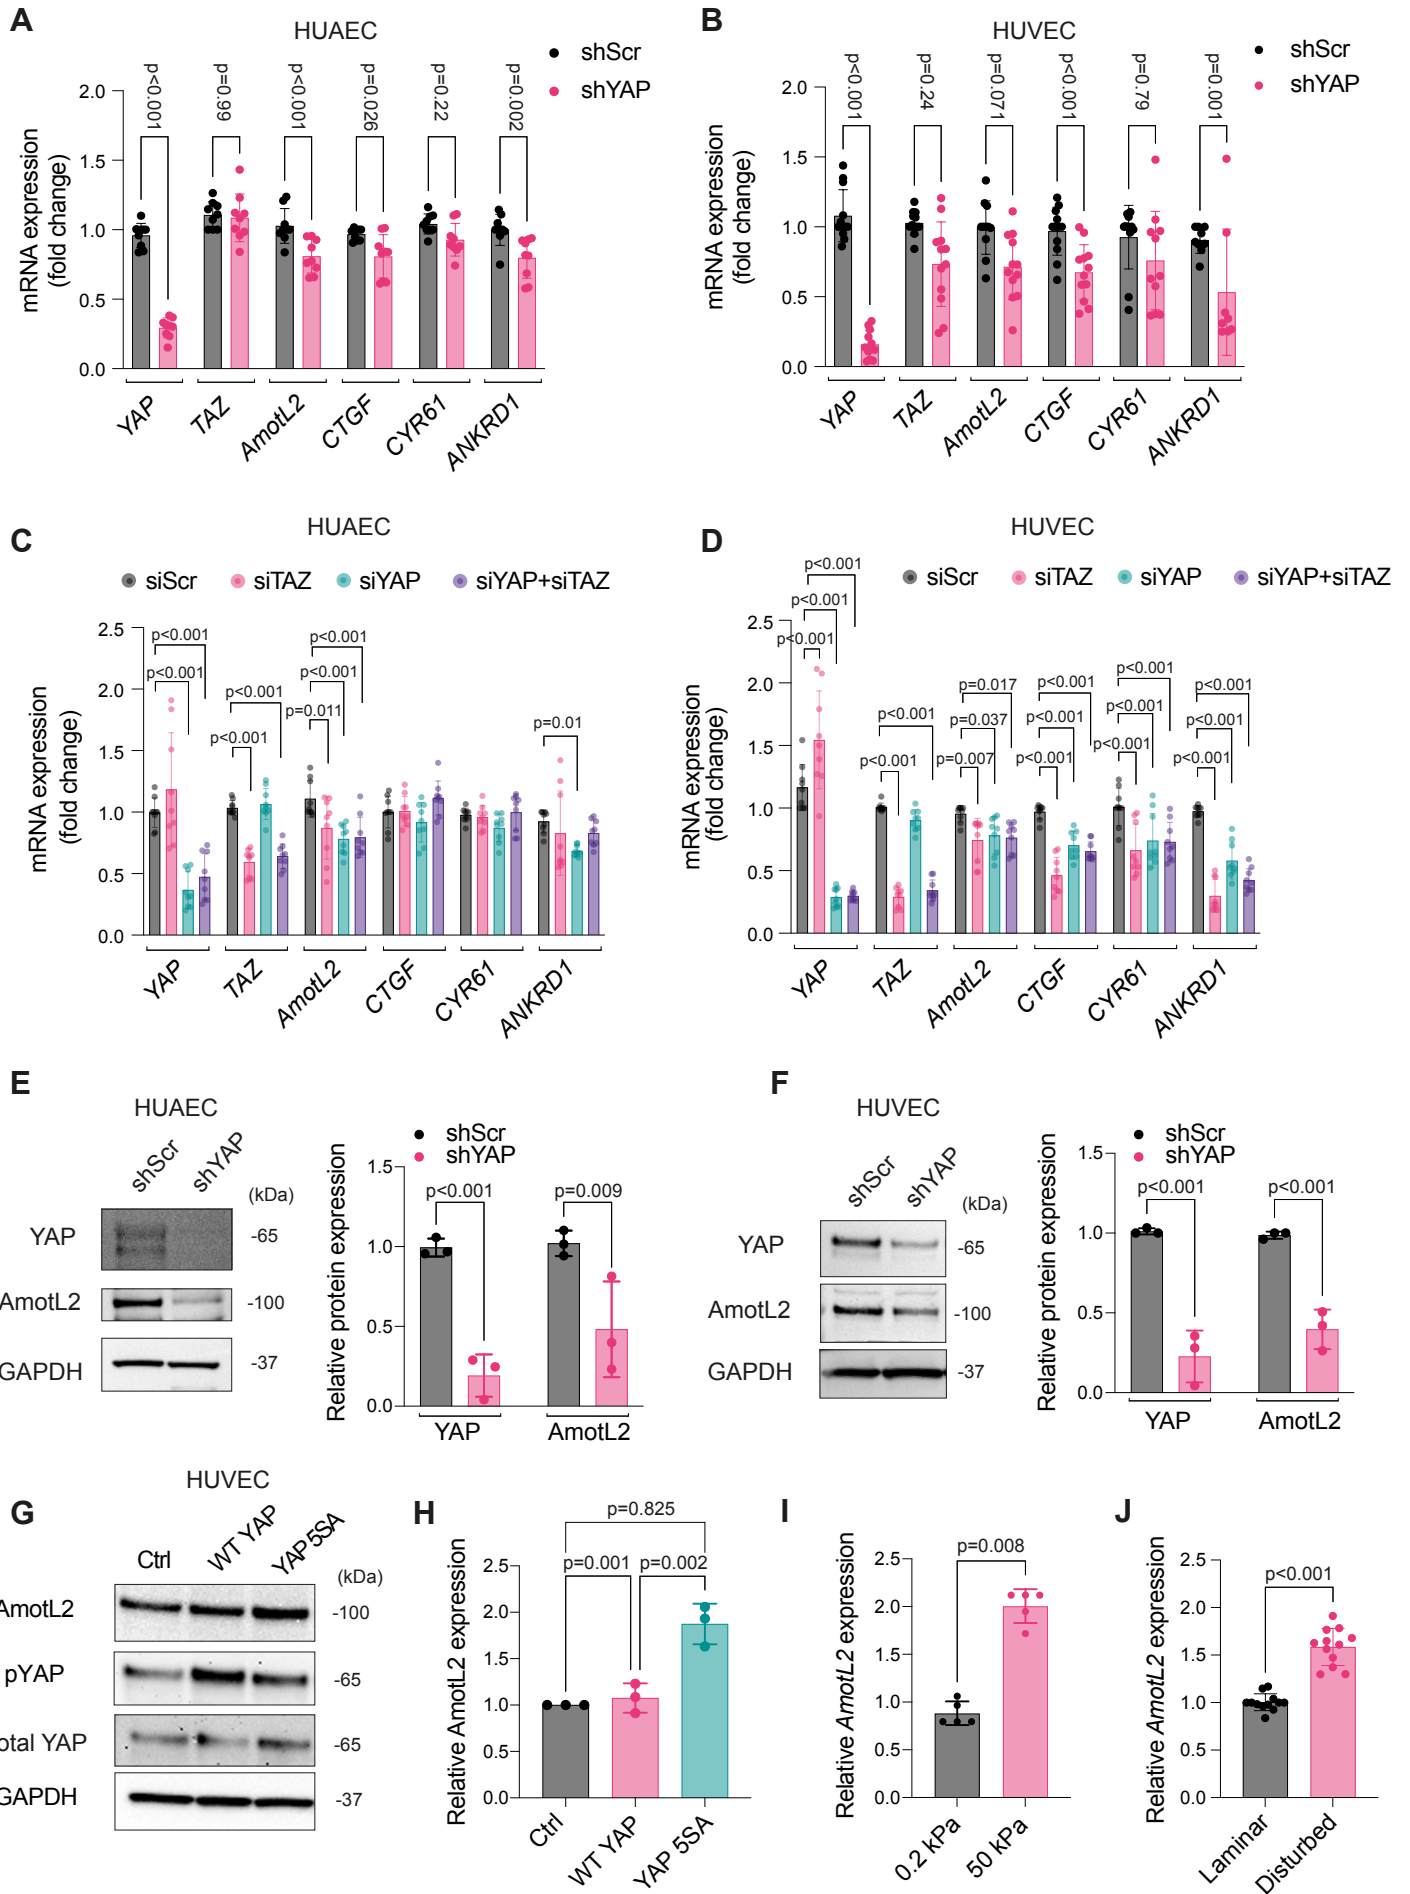

**Fig. S3.**

AmotL2 is transcriptionally regulated by YAP. **A**, Fold change in mRNA expression of *AmotL2* and known YAP target genes (*CTGF*, *CYR61* and *ANKRD1*) in HUAEC cells and HUVEC (**B**) transduced with shScr or shYAP lentivirus, analysed by qPCR and normalised to GAPDH.  $n=3$  independent experiments, each with 3 technical replicates. (mean $\pm$  s.d., 2way ANOVA with Dunnett's multiple comparisons). **C**, Fold change in mRNA expression of *AmotL2* and known YAP target genes (*CTGF*, *CYR61* and *ANKRD1*) in HUAEC and HUVEC (**D**) cells transfected with scrambled siRNA (siScr), siTAZ, siYAP or codepletion of YAP and TAZ (siYAP+siTAZ) analysed by qPCR and normalised to GAPDH.  $n=3$  independent experiments, each with 3 technical replicates. (mean $\pm$  s.d., 2way ANOVA with Dunnett's multiple comparisons). **E**, Representative western blot showing YAP and *AmotL2* expression in HUAEC cells and HUVEC (**F**) transduced with shScr or shYAP lentivirus for 96h prior to immunoblot analysis. GAPDH was used as a loading control and normalisation for respective quantification shown in the right-hand panel,  $n=3$  independent experiments. (mean $\pm$  s.d., 2way ANOVA with Dunnett's multiple comparisons). **G**, Representative western blot and quantification (**H**), showing *AmotL2*, total and phosphorylated YAP expression in none infected, WT YAP and YAP 5SA-overexpressing HUVEC,  $n=3$  independent experiments. (mean $\pm$  s.d., 2way ANOVA with Dunnett's multiple comparisons). **I**, RT-qPCR of *AmotL2* from HUVEC plated to 0.2 or 50 kPa hydrogels, ( $n=5$  independent experiments, mean $\pm$  s.d., Mann-Whitney). **J**, RT-qPCR of *AmotL2* from HUVEC plated to 6 well plates at confluency before being subject to orbital flow for 48 h before lysates were harvested as described in the materials and methods so as to obtain laminar and disturbed flow transcriptional responses ( $n=4$  independent experiments, mean $\pm$  s.d., Mann-Whitney).

# Supplemental Figure 4

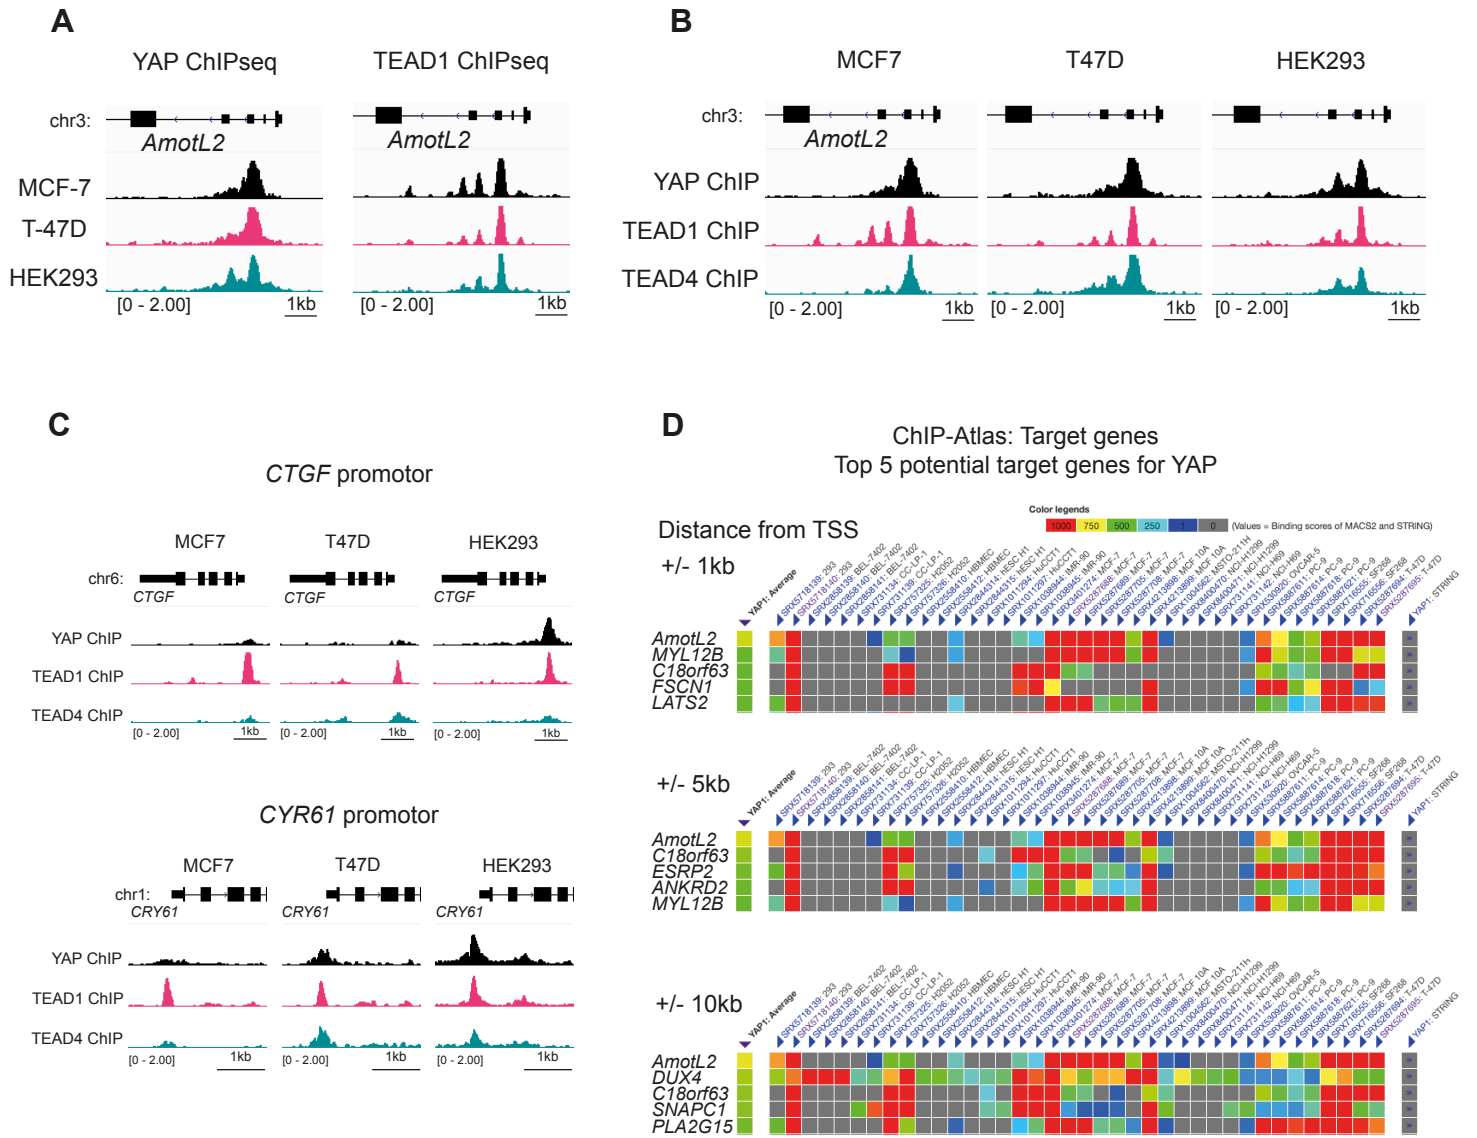



**Fig. S4.**

**A**, Genomic tracks displaying ChIP-Atlas (<https://chip-atlas.org/>) data of YAP (left panel) and TEAD1 (right panel) ChIP-seq data across MCF7, T47D, and HEK293, within the AmotL2 promotor (Data sources are referenced in the methods). **B**, Genomic tracks displaying overlaid YAP, TEAD1 and TEAD4 ChIP-seq enrichment at the AmotL2 promotor of indicated cell lines. **C**, Genomic tracks displaying overlaid YAP, TEAD1 and TEAD4 ChIP-seq enrichment at the CTGF and CYR61 promotor of indicated cell lines. **D**, Top 5 hits of ChIP-Atlas predicted target genes bound by YAP in indicated datasets at 1, 5 and 10 kb from the transcriptional start site (TSS) of indicated target genes.

# Supplemental Figure 5

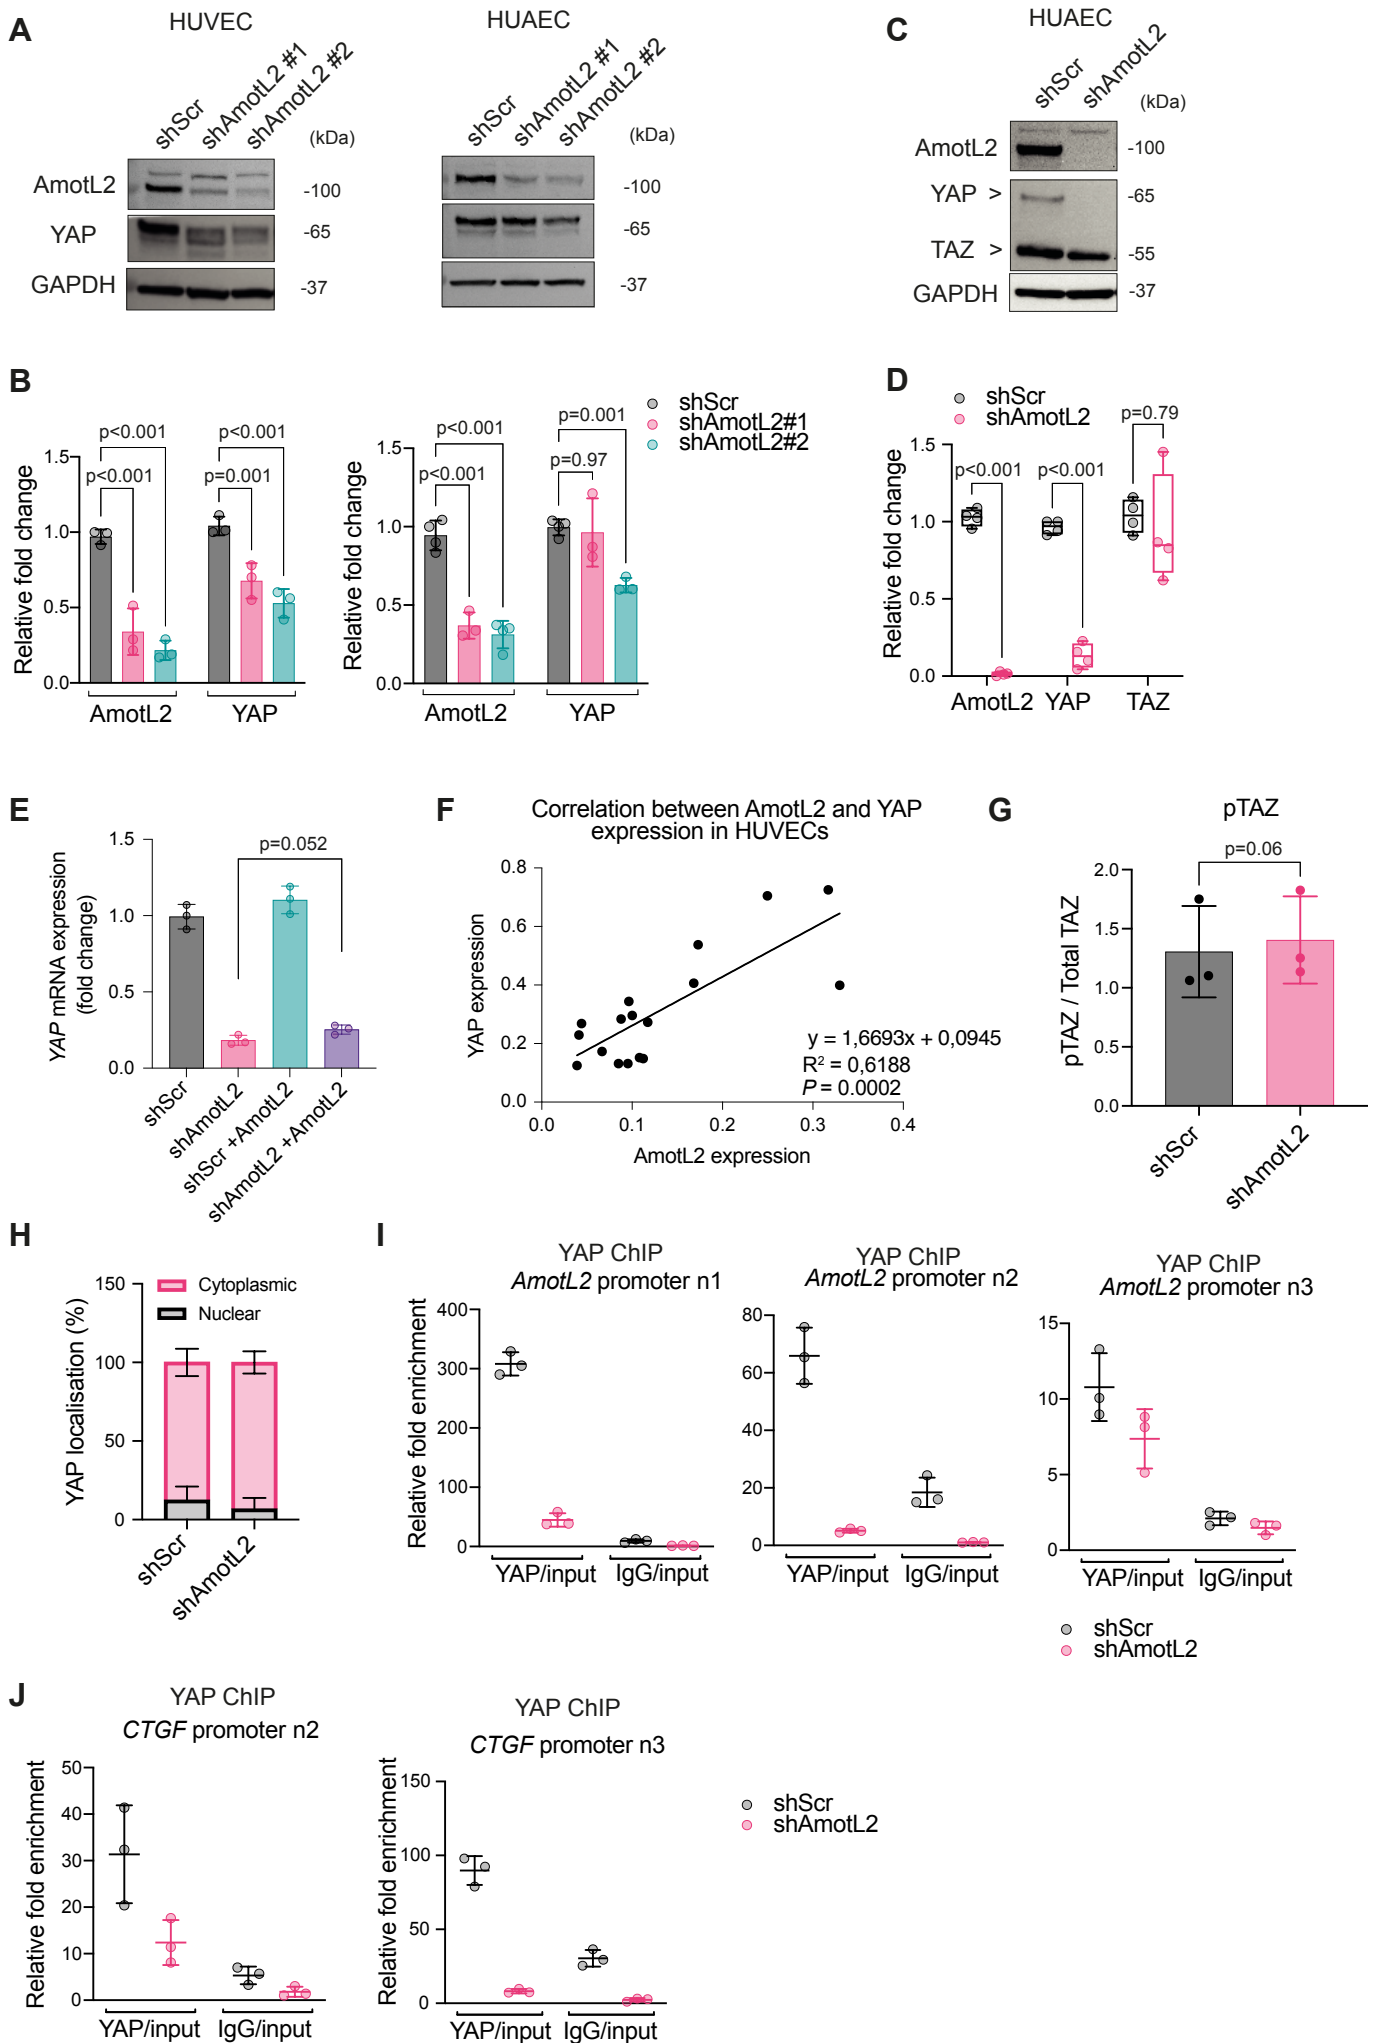

**Fig. S5.**

**A**, Western blot analysis of AmotL2 and YAP in HUVEC and HUAEC cells 96h post-treatment with lentivirus encoding shScr or two additional shRNA constructs targeting AmotL2 (shAmotL2#1 and shAmotL2#2). GAPDH was used as a loading control. Membranes are representative of n=3 independent experiments. **B**, Quantification of AmotL2 and YAP protein levels from panel a, relative to GAPDH loading control. n=3 independent experiments for both HUVEC and HUAEC, mean± s.d., 2way ANOVA with Dunnett's multiple comparisons. **C**, Western blot analysis of shAmotL2 treated HUAEC using an antibody with specificity for both YAP and TAZ. Box plots shown in **D**, indicate quantification of AmotL2, YAP, and TAZ relative to GAPDH loading control, n=4, mean± s.d., 2way ANOVA with Dunnett's multiple comparisons. **E**, SYBR green RT-qPCR of *YAP* expression relative to housekeeping gene *GAPDH*, in shScr and AmotL2 +/- AmotL2 overexpression. (n=3 independent experiments, mean± s.d., 2way ANOVA with Dunnett's multiple comparisons). **F**, Correlation between *AmotL2* and *YAP* expression normalized to *GAPDH* from n=17 AmotL2 HUVEC knockdown samples. **G**, Quantification of pTAZ ser89 levels, relative to total TAZ shown in Fig4e. (n=3 independent experiments, mean± s.d., Mann-Whitney). **H**, Quantification of nuclear:cytoplasmic fractionation and probing of YAP localisation, shown in Fig4g. HUVEC cells 96h post-treatment with shScr or shAmotL2 lentivirus. GAPDH and lamin A/C were used as positive and negative controls and were used for normalisation for quantification. n=3 independent experiments. ChIP showing YAP binding to *AmotL2* promotor (**I**) and *CTGF* promotor (**J**) of shScr or shAmotL2 treated HUVEC. ChIP qPCR was performed using SYBR green reagents and quantification was normalised to an IgG control antibody. Plot shown is a representative experiment from n=3 independent experiments (Fig3h shows n=1 for the *CTGF* promotor). Each data point represents a technical repeat within one independent experiment (performed in triplicate). Graphs display (mean± s.d.).

## Supplemental Figure 6

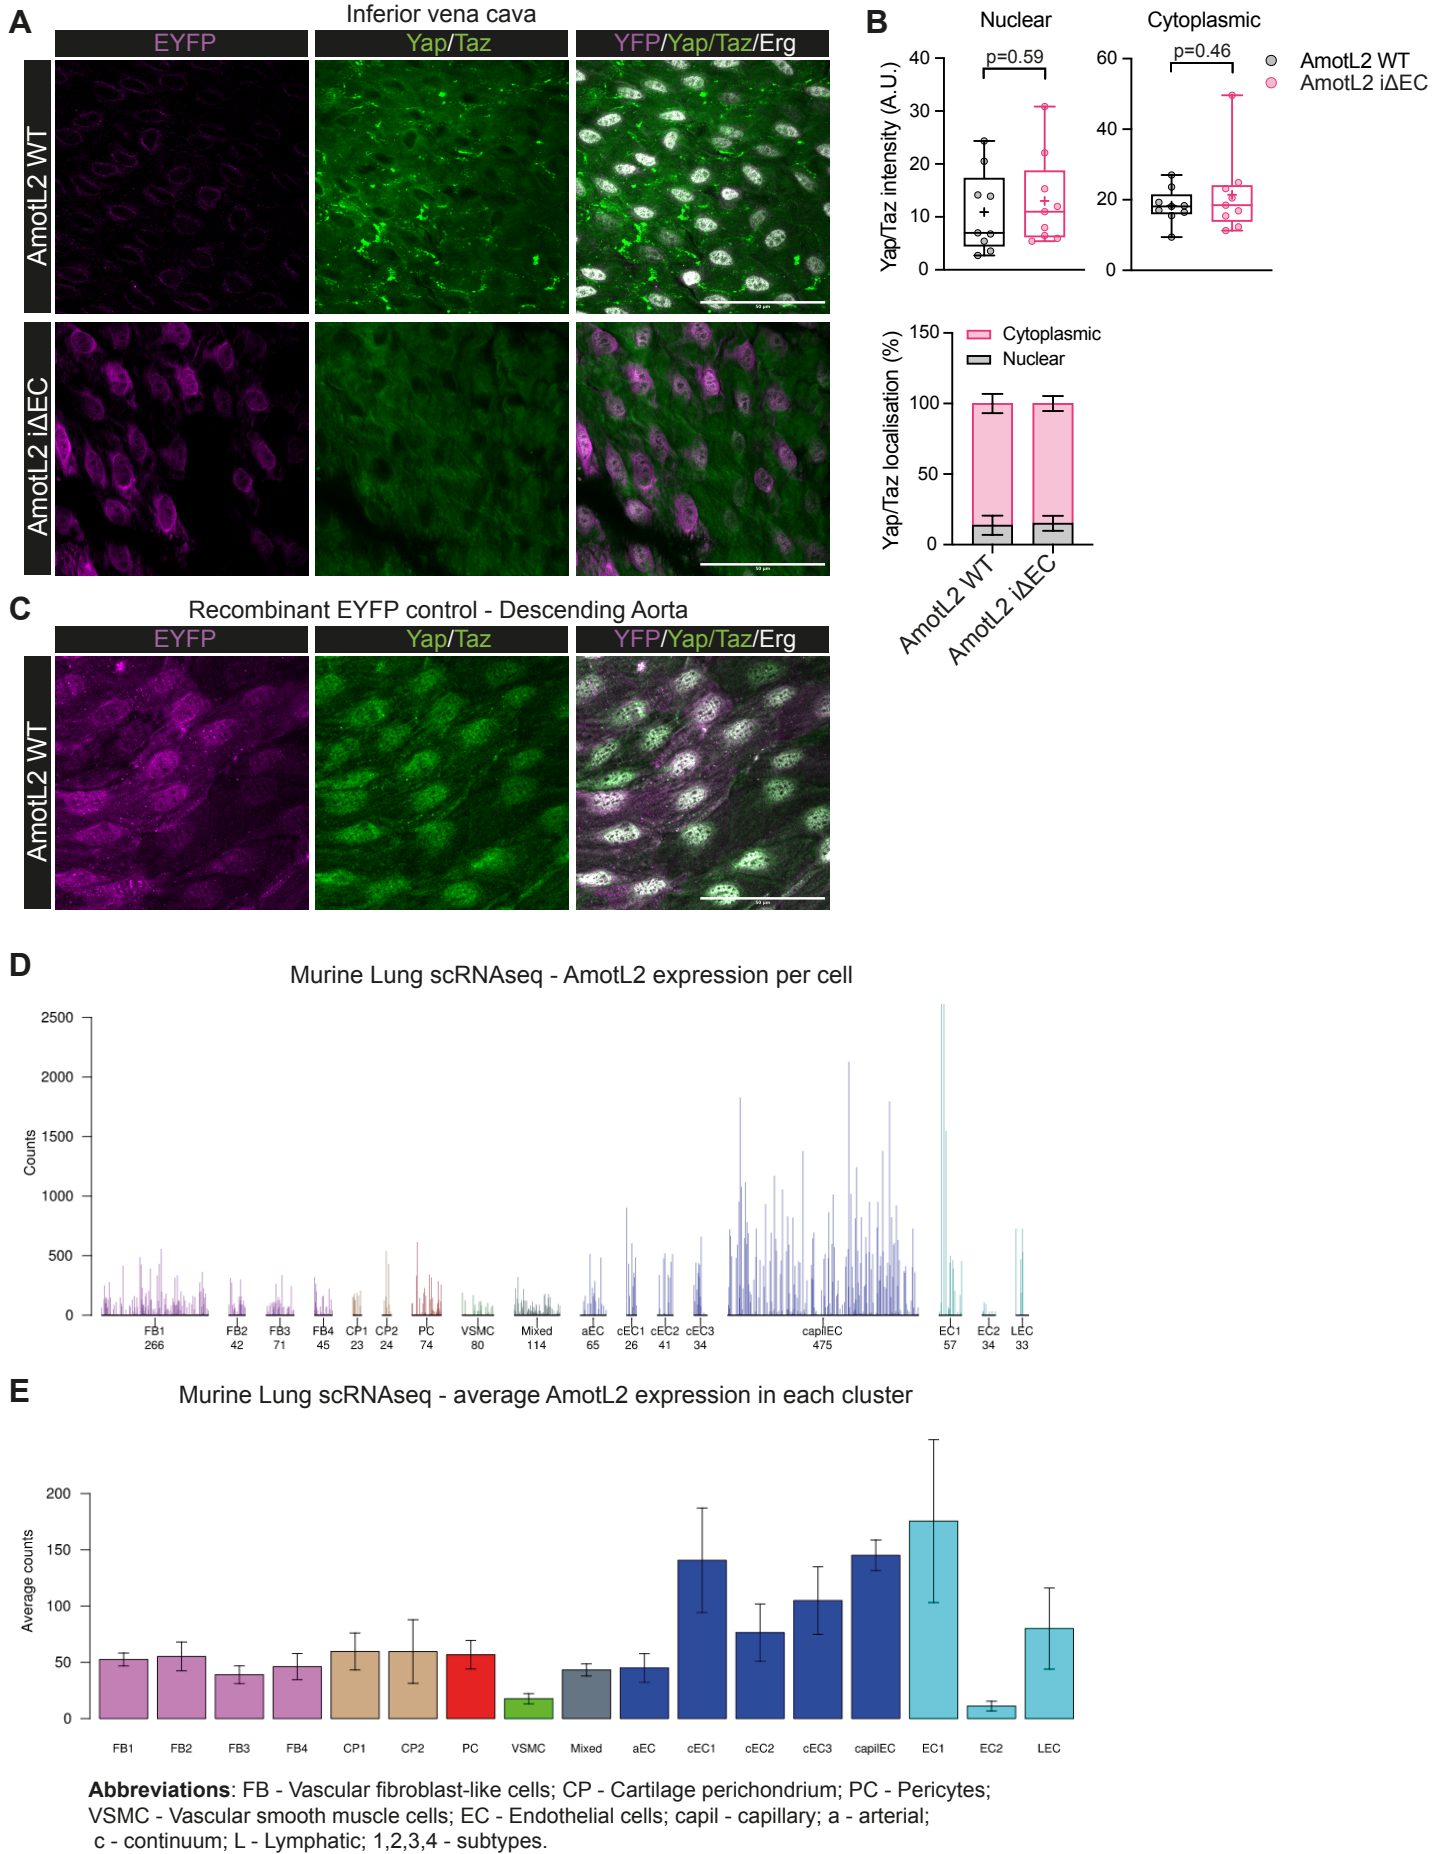

**Fig. S6.**

**A**, Representative images of en face staining of EYFP (magenta), Yap/Taz (green), and ERG (grey) in the inferior vena cava of both AmotL2 WT and AmotL2 iΔEC mice. Scale bar, 50μm. Images are representative of n=3 mice/group. **B**, Quantification of Yap/Taz nuclear:cytoplasmic localisation and immunofluorescent intensity of the inferior vena cava of both AmotL2 WT (n=3) and AmotL2 iΔEC (n=3) mice. **C**, Staining as in a, of recombinant EYFP control murine aorta indicating that induction of EYFP expression in WT AmotL2 cells does not affect Yap/Taz expression. Scale bar, 50μm. Images are representative of n=3 mice/group. **D**, Raw counts of AmotL2 expression across cell types of adult lung from scRNAseq data accessed through (<https://betsholtzlab.org/VascularSingleCells/database.html>) (30, 31). **E**, As in d, but displaying average counts.

# Supplemental Figure 7

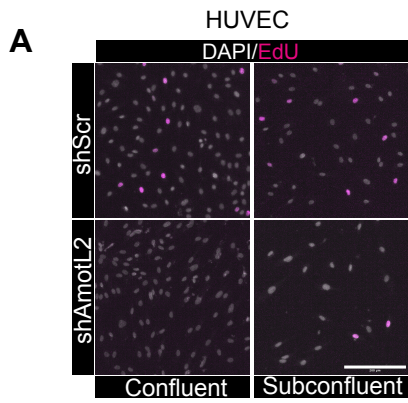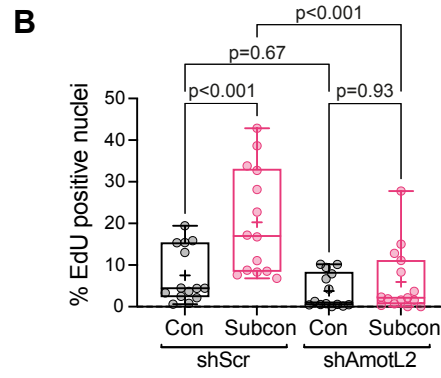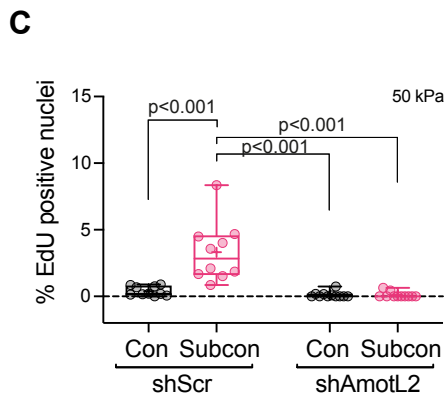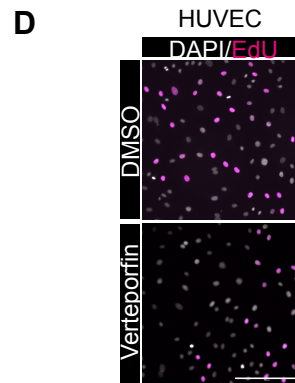

**Fig. S7.**

**A**, Representative images of shScr and shAmotL2 treated HUVEC 72h post infection, replated to gelatin coated plastic in confluent or subconfluent conditions. Incorporated EdU was detected with secondary antibodies and counterstained with Hoechst. Scale bar, 250 $\mu$ m. **B**, Box plots show quantification of a, where % of EdU positive cells was calculated against total number of cells stained with Hoechst. Each data point represents one field of view from  $n=3$  independent experiments. (mean $\pm$  s.d., 2way ANOVA with Dunnet's multiple comparisons). **C**, Box plots show quantification of EdU incorporation of HUVEC replated to gelatin coated 50kPa hydrogels following 48h post-lentiviral transduction with shScr or shAmotL2 lentivirus, where % of EdU positive cells was calculated against total number of cells stained with Hoechst. Each data point represents one field of view from  $n=3$  independent experiments. (mean $\pm$  s.d., 2way ANOVA with Dunnet's multiple comparisons). **D**, Representative images of EdU positive HUVEC treated for 48h with 0.2 $\mu$ g/ml Verteporfin or DMSO vehicle. Scale bar, 50 $\mu$ m. Cells were counterstained with Hoechst. Scale bar, 50 $\mu$ m.

# Supplemental Figure 8

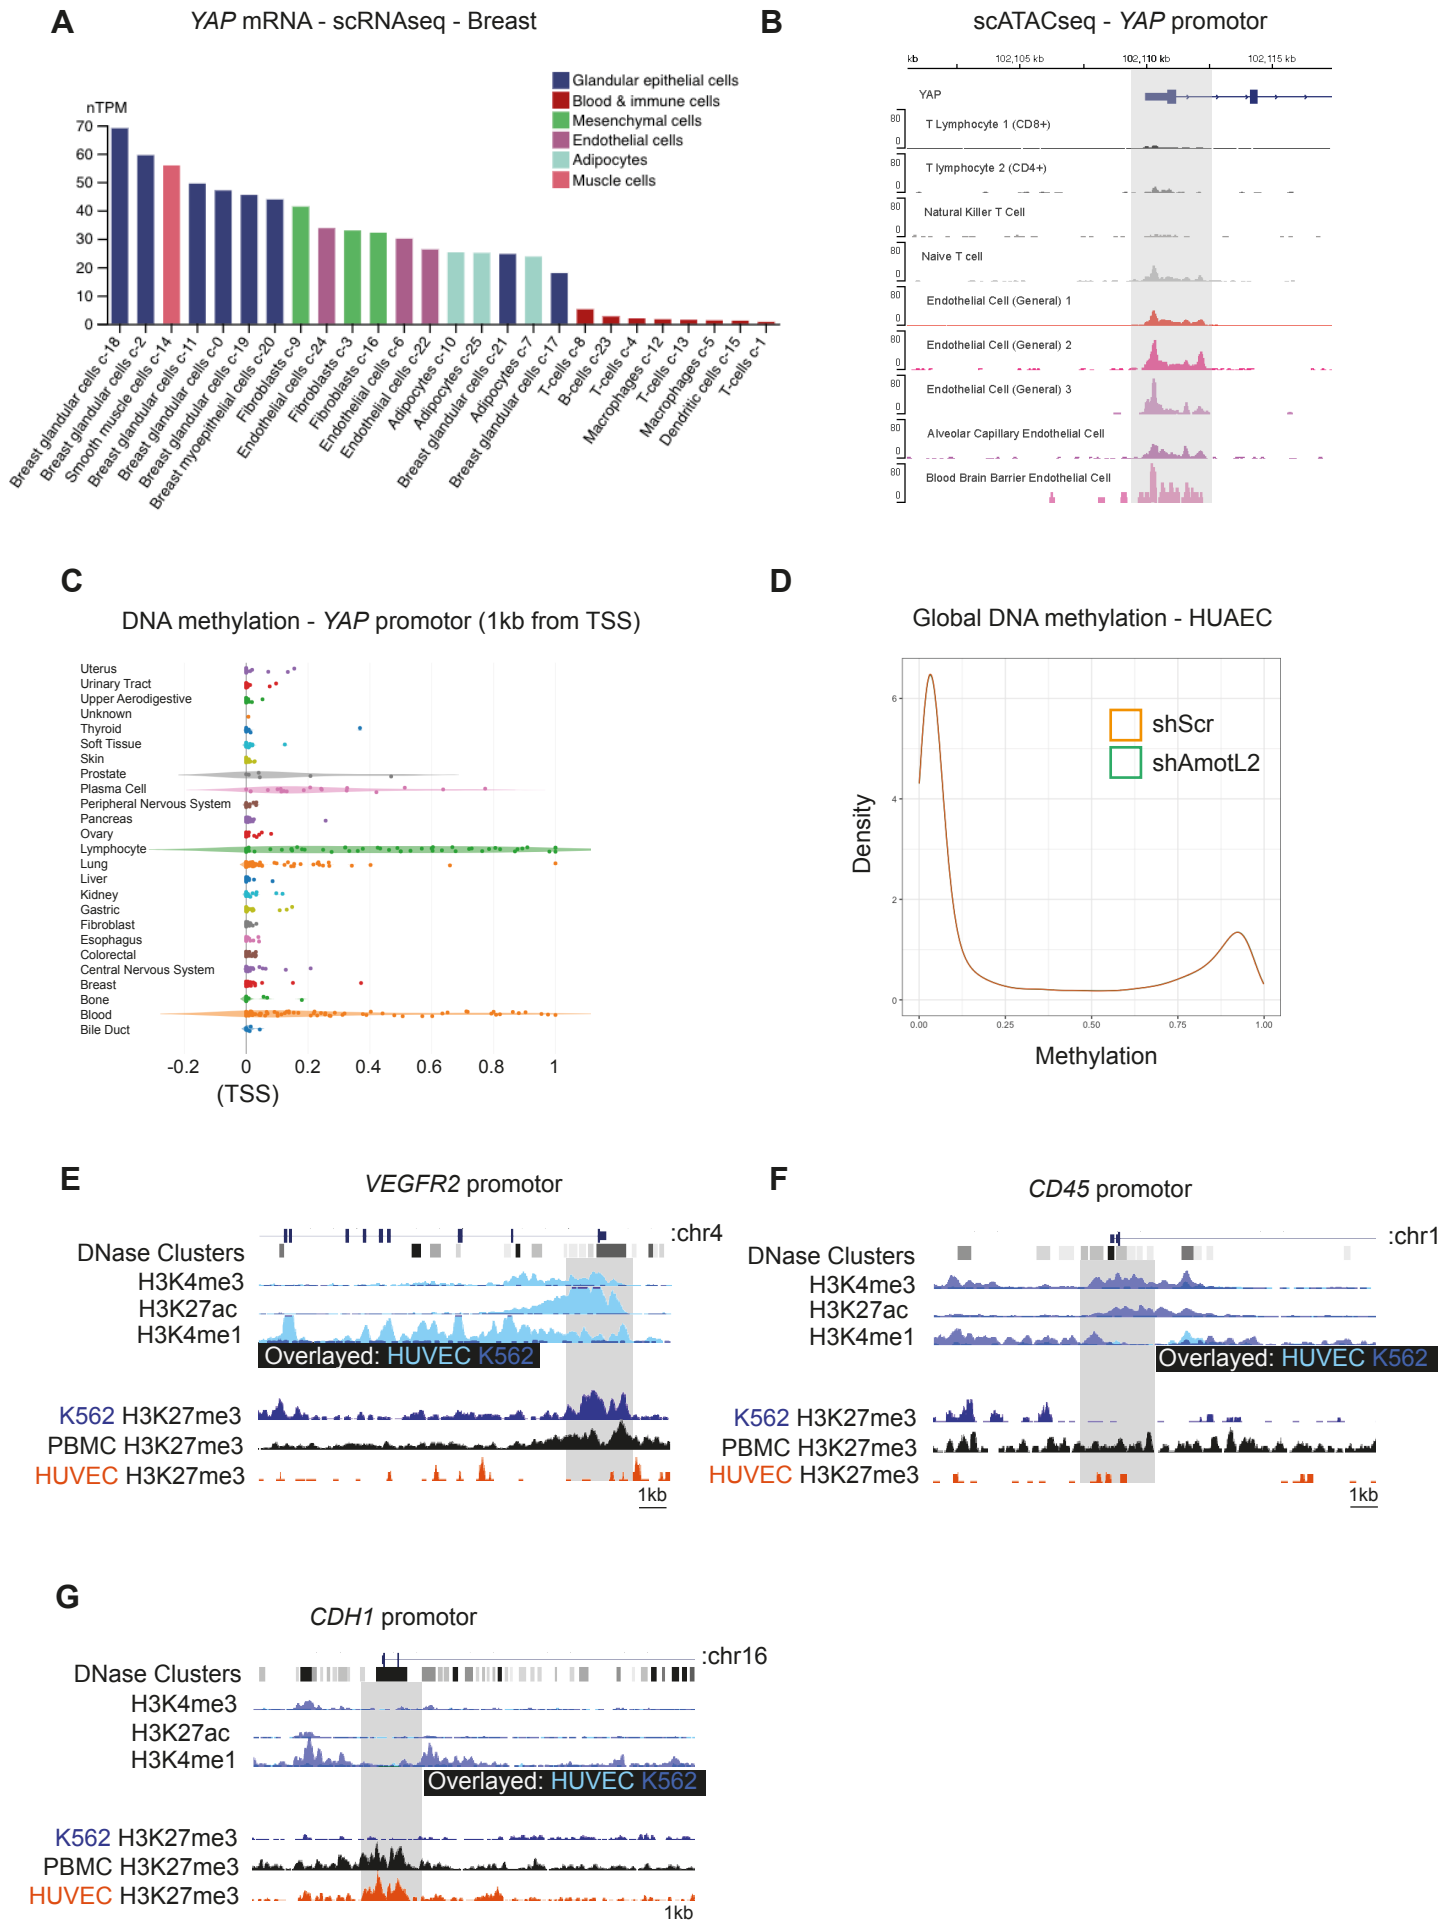



**Fig. S8.**

**A**, Screenshot of the Human protein atlas showing *YAP* mRNA expression from scRNAseq data of human breast cancer samples. **B**, scATACseq data indicating chromatin conformation around the *YAP* promoter using ([http://catlas.org/catlas\\_hub/](http://catlas.org/catlas_hub/)). Histograms indicate chromatin accessibility from specific cell types. **C**, publicly available DNA methylation data from the Dependency Map (Depmap.org) portal, showing DNA methylation of indicated cell types derived from human samples. **D**, Infinium EPIC array of 850,000 CpG sites across the genome. Data are averages of  $n=4$  for both shScr and shAmotL2 HUAEC samples. Histograms show the average distribution of DNA methylation profile of shScr (orange) and shAmotL2 (green). Screenshot of the UCSC browser displaying genomic tracks of ENCODE data of H3K4me3, H3K27ac and H3K4me1 ChIP-seq data across HUVEC and K562 (overlaid)(Data sources are referenced in the methods) and H3K27me3 of ChIP-seq data across K562, PBMC and HUVEC (Data sources are referenced in the methods), within the *VEGFR2* promoter (**E**), *CD45* promoter (**F**), *CHD1* promoter (**G**).

## Supplemental Figure 9

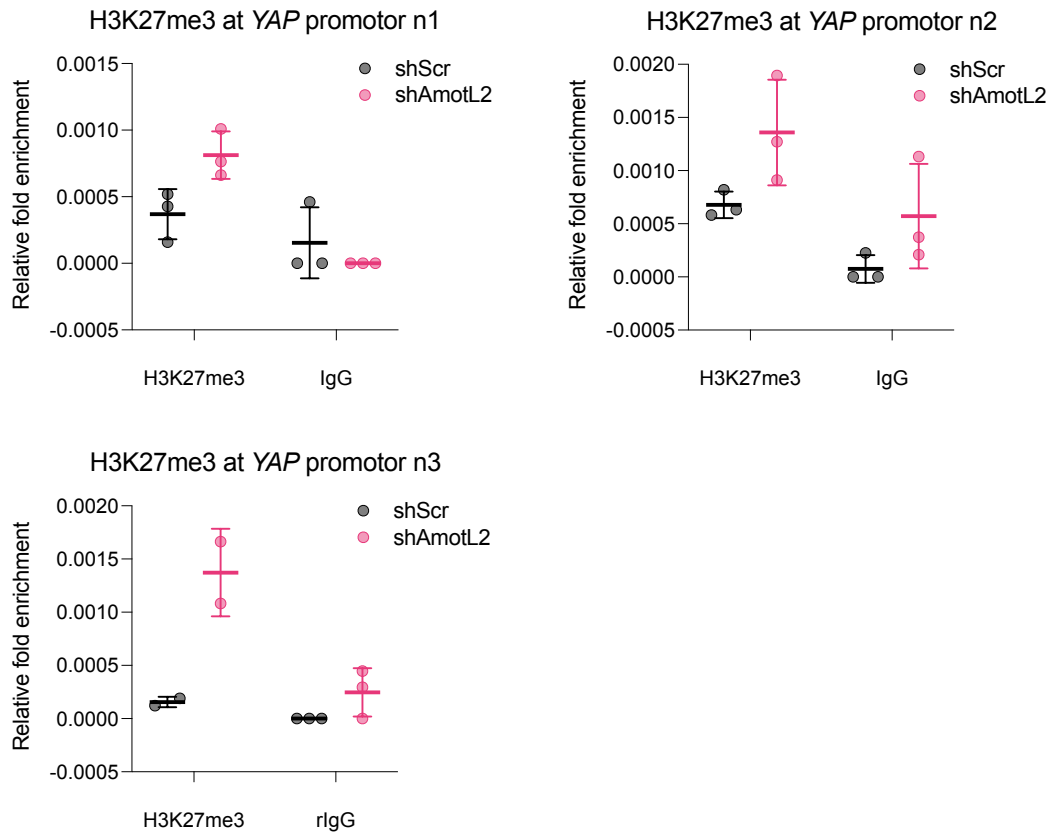

**Fig. S9.**

ChIP showing H3K27me3 pulldown at the *YAP* promotor of shScr or shAmotL2 treated HUAEC. ChIP qPCR was performed using SYBR green reagents and quantification was normalised to input and IgG control. Plots shown are representative of n=3 independent experiments. Each data point represents a technical repeat within one independent experiment (performed in triplicate). Graphs display (mean $\pm$  s.d.).

# Supplemental Figure 10

**A**

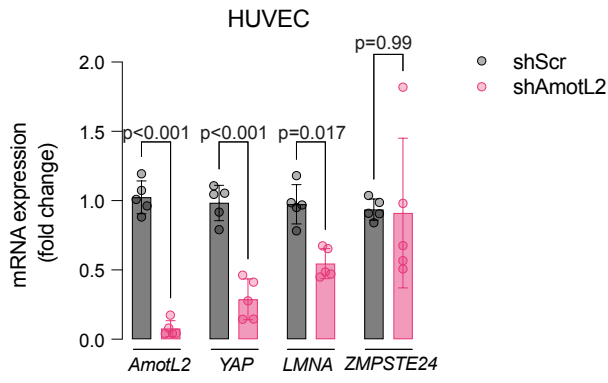

**B**

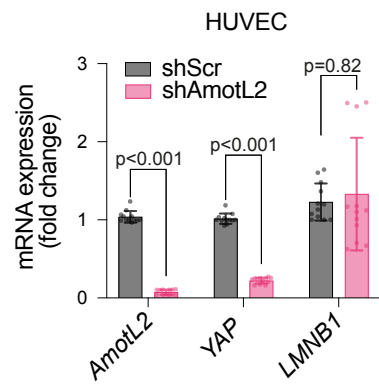

KEGG - Differential peaks in shScr vs shAmotL2 HUVEC

**C**

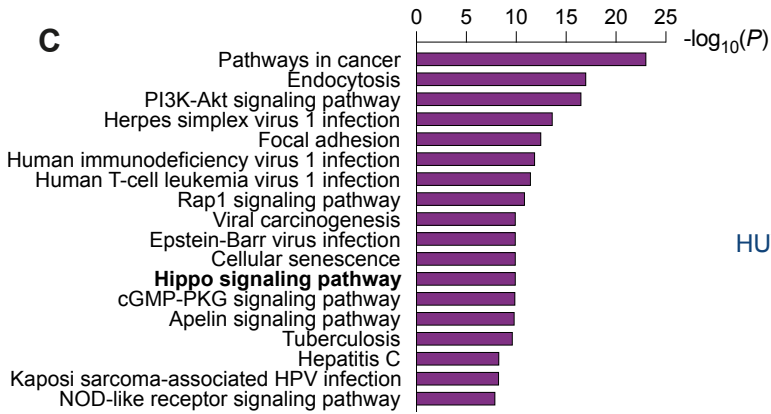

**D**

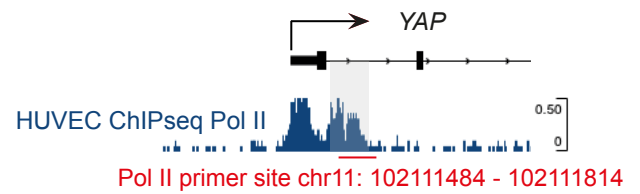

**E**

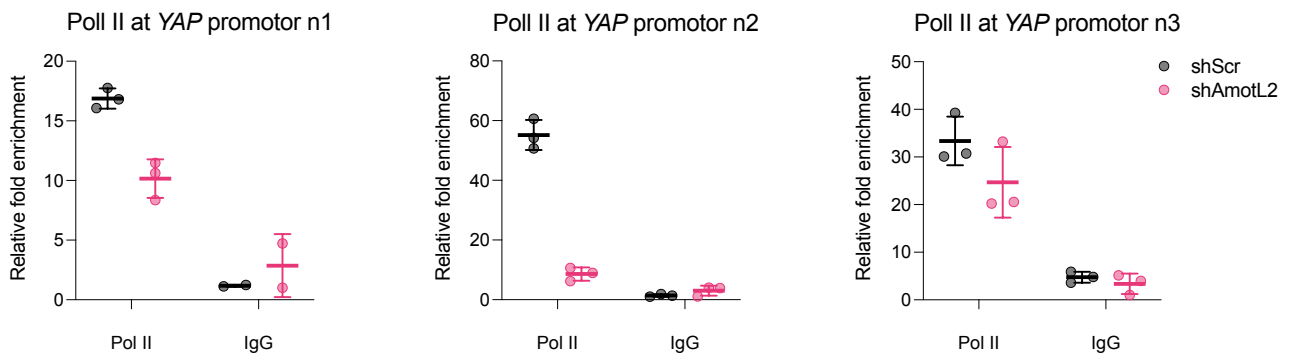

**F**

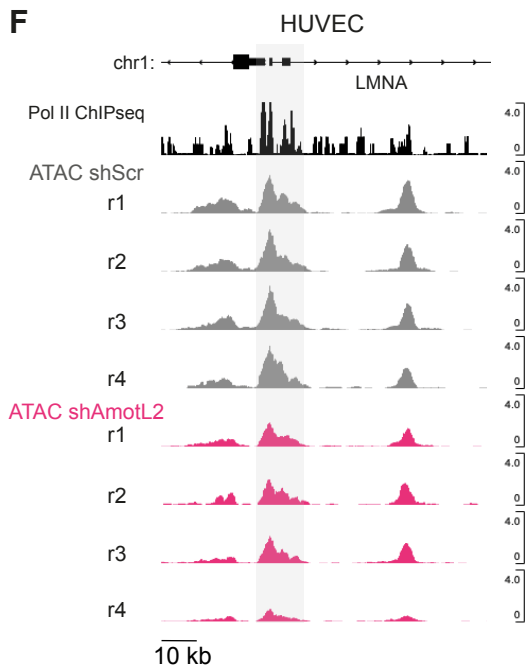

**Fig. S10.**

**A**, SYBR green RT-qPCR of *AmotL2*, *YAP*, *LMNA* and *ZMPSTE24* relative to housekeeping gene *GAPDH*, in *AmotL2* knockdown HUVEC cells. ( $n=5$  independent experiments, mean $\pm$  s.d., 2way ANOVA with Šidák's multiple comparisons). **B**, SYBR green RT-qPCR of *AmotL2*, *YAP*, and *LMNB1* relative to housekeeping gene *GAPDH*, in *AmotL2* knockdown HUVEC cells. ( $n=4$  independent experiments, mean $\pm$  s.d., 2way ANOVA with Šidák's multiple comparisons). **C**, Top 20 differential KEGG pathway analysis of shScr, shAmotL2 transduced HUVEC indicating pathways with differential peak accessibility. Note 'Hippo signalling pathway' in bold. **D**, Schematic of primers designed for ChIP analysis of region highlighted in the second peak of bimodal accessibility within the *YAP* promotor where differential accessibility was observed from ATAC-seq data shown in Fig7i-j. **E**, ChIP showing Pol II pulldown at the region of the *YAP* promotor show in (d) of shScr or shAmotL2 treated HUVEC. ChIP qPCR was performed using SYBR green reagents and quantification was normalised to input and IgG control. Plots shown are representative of  $n=3$  independent experiments. Each data point represents a technical repeat within one independent experiment (performed in triplicate). Graphs display (mean $\pm$  s.d.). **F**, IGV browser view of the *LMNA* promotor showing publicly available ChIPseq data of Pol II, alongside ATACseq data of HUVEC treated with shScr or shAmotL2. r indicates independent biological replicates, of which there are  $n=4$  per condition.

# Supplemental Figure 11

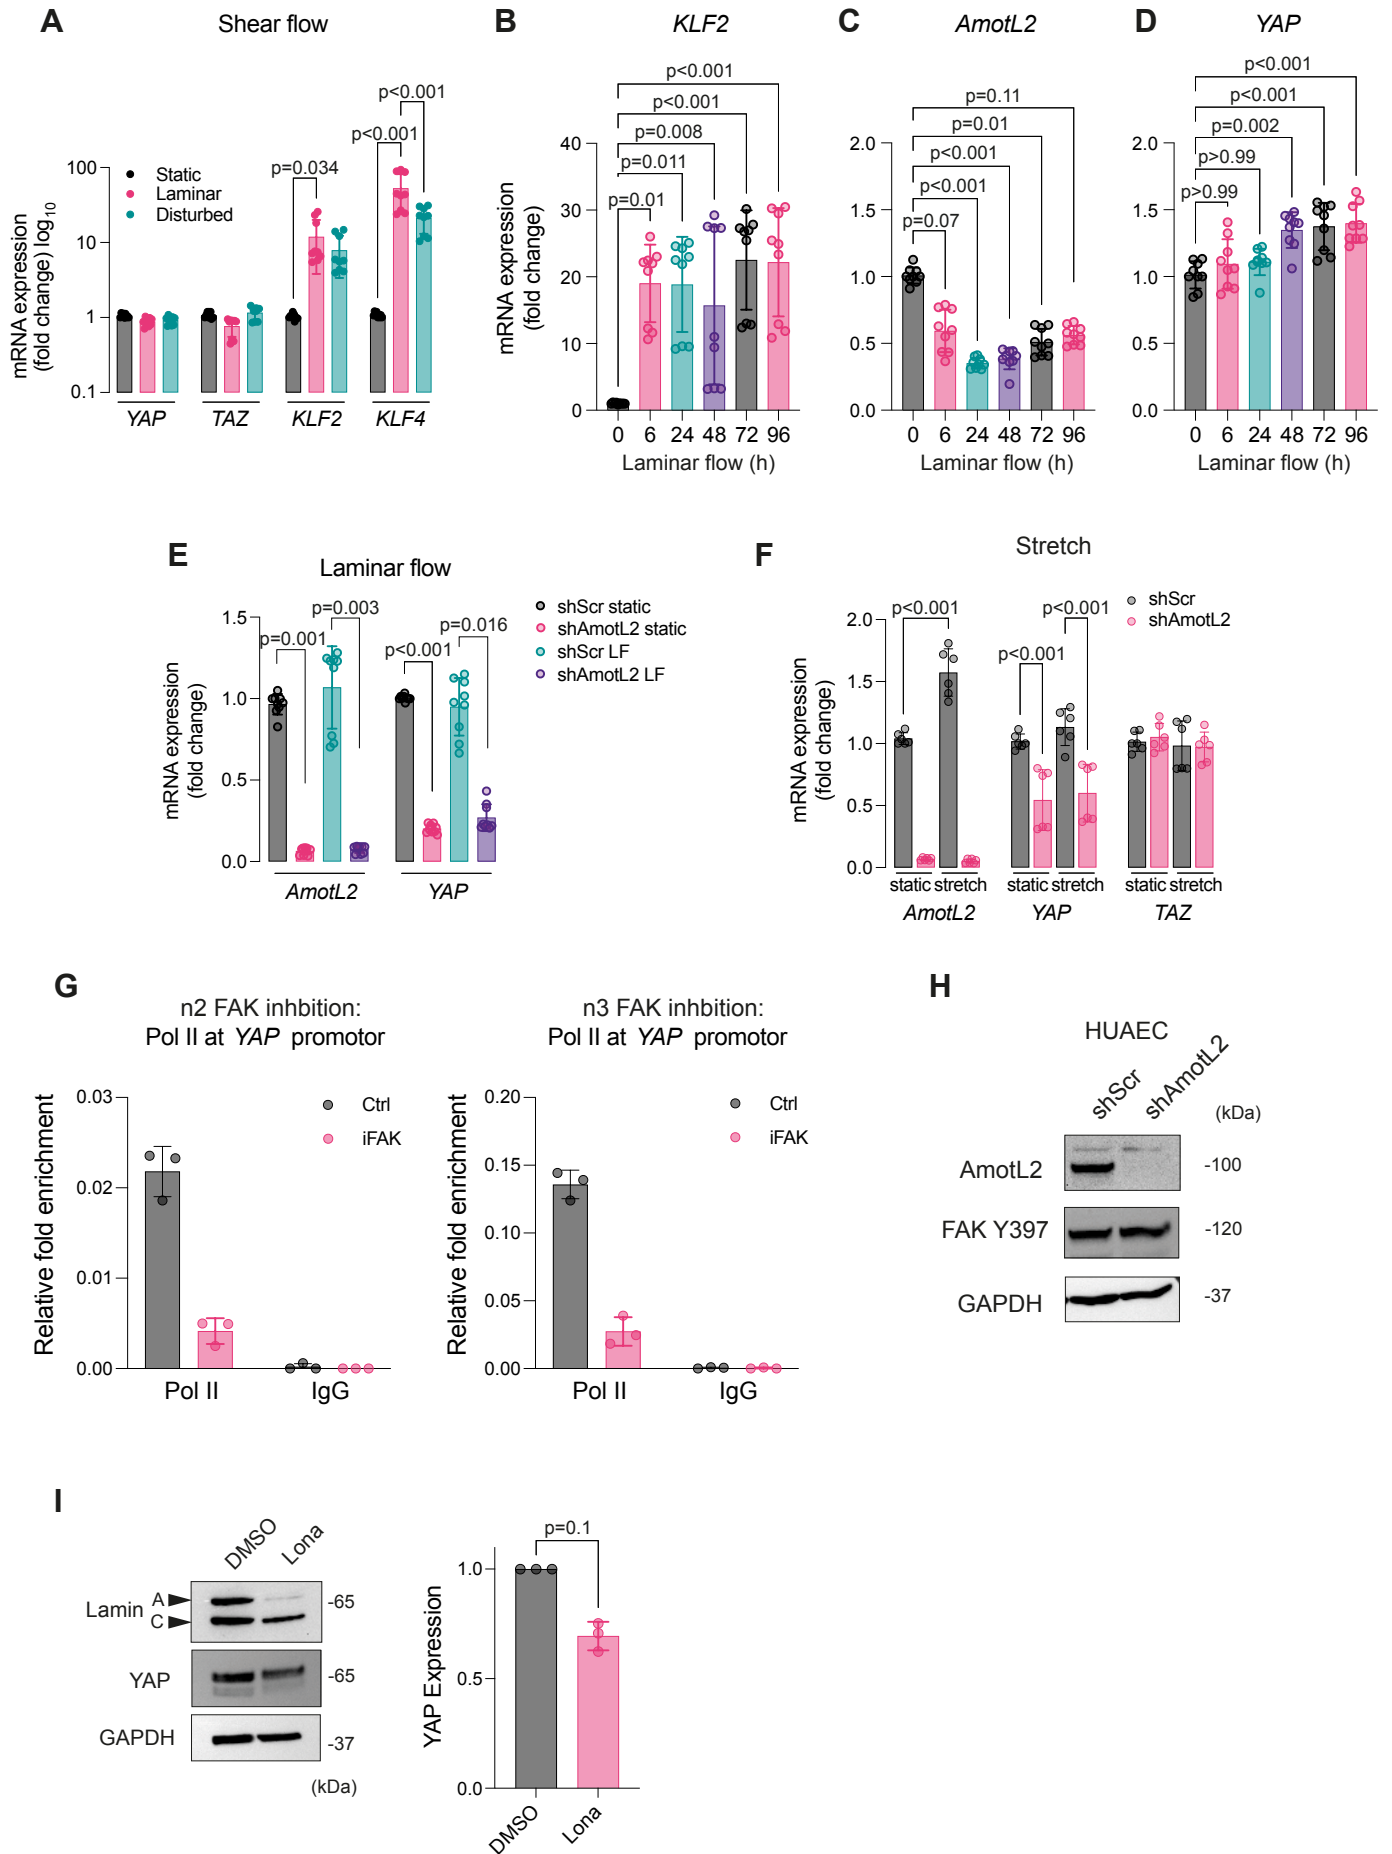

**Fig. S11.**

**A**, SYBR green RT-qPCR of YAP, TAZ, KLF2 and KLF4 relative to housekeeping gene GAPDH, in HUVEC cells exposed to static, laminar or disturbed flow conditions. ( $n=3$  independent experiments, mean $\pm$  s.d., 2way ANOVA with Dunnett's multiple comparisons). **B**, RT-qPCR of *KLF2* (**B**), *AmotL2* (**C**) and *YAP* (**D**) from HUVEC plated to 6 well plates at confluency before being subject to orbital flow for indicated time points before lysates were harvested as described in the materials and methods so as to obtain laminar flow transcriptional responses ( $n=3$  independent experiments, mean $\pm$  s.d., Kruskal-Wallis with Dunn's multiple comparisons). **E**, RT-qPCR of *AmotL2* and *YAP* from HUVEC following 72 h shScr or shAmotL2 knockdown and either static or exposure to 48 h orbital flow ( $n=3$  independent experiments, mean $\pm$  s.d., Kruskal-Wallis with Dunn's multiple comparisons). **F**, RT-qPCR of YAP, TAZ, and AmotL2 relative to housekeeping gene GAPDH, of shScr and shAmotL2 treated HUVEC exposed to uniaxial 19% stretch for 24 h. ( $n=2$  independent experiments, mean $\pm$  s.d., 2way ANOVA with Dunnett's multiple comparisons). **G**, ChIP showing Pol II binding to YAP promotor of control or FAK inhibitor treated HUVEC. ChIP qPCR was performed using SYBR green reagents and quantification was normalised to an IgG control antibody. Plots shown are representative experiments from  $n=3$  independent experiments (Fig8c shows  $n=1$ ). Each data point represents a technical repeat within one independent experiment (performed in triplicate). Graphs display (mean $\pm$  s.d.). **H**, Western blot analysis of AmotL2 and phospho FAK in HUAEC cells 96h post-treatment with shScr or shAmotL2 lentivirus. Membranes shown in Supplemental figure 5C were re-probed for FAK Y397. GAPDH was used as a loading control. Data are representative of  $n=2$  independent experiments. **I**, Western blot analysis of YAP and Lamin A/C in HUVEC cells 48 h post-Lonafarnib 10  $\mu$ M treatment. GAPDH was used as a loading control. Bar graph indicates quantification of YAP, relative to GAPDH. ( $n=3$  independent experiments, mean $\pm$  s.d., Mann-Whitney).

**Table S1.**

List of primers used for RT-PCR analysis.

| <b>Target</b>   | <b>Forward sequence (5'-3')</b> | <b>Reverse sequence (5'-3')</b> |
|-----------------|---------------------------------|---------------------------------|
| <i>YAP</i>      | AATTGAGAACAATGACGACC            | AGTATCACCTGTATCCATCTC           |
| <i>TAZ</i>      | TTTTCCAGAAGATGAATCCG            | CAGGCTCCTTAAAGAAAGAG            |
| <i>AMOTL2</i>   | GCAGAAGTATTTGGAGGAAC            | CCTTTAACCTGCTTTCCATC            |
| <i>CTGF</i>     | TTAAGAAGGGCAAAAAGTGC            | CATACTCCACAGAATTTAGCTC          |
| <i>CYR61</i>    | TTGATTGCAGTTGGAAAAGG            | GCCTTGTAAGGGTTGTATAG            |
| <i>ANKRD1</i>   | TGAGTATAAACGGACAGCTC            | TATCACGGAATTCGATCTGG            |
| <i>EZH2</i>     | AAGAAATCTGAGAAGGGACC            | CTCTTACTTCATCAGCTCG             |
| <i>GAPDH</i>    | TCGGAGTCAACGGATTTTC             | CAACAATATCCACTTTACCAGAG         |
| <i>KLF2</i>     | CCAAGAGTTCGCATCTGAAGGC          | CCGTGTGCTTTCGGTAGTGCC           |
| <i>KLF4</i>     | CATCTCAAGGCACACCTGCGAA          | TCGGTCGCATTTTTGGCACTGG          |
| <i>LMNA</i>     | AGAACATCTACAGTGAGGAG            | CAGAATAAGTCTTCTCCAGC            |
| <i>LMNB</i>     | AAAATTCTCAGGGAGAGGAG            | TGGAAAAGTTCTTCTCAAC             |
| <i>ZMPSTE24</i> | ACTCAGTGTATTTTGTTGCC            | AACCAGAGACACAACCTAATG           |



**Table S2.**

Software used to process and perform statistical analysis of ATAC-seq datasets.

| Analysis                    | Software                          | Version      | Parameters                                                                 | Remarks                        |
|-----------------------------|-----------------------------------|--------------|----------------------------------------------------------------------------|--------------------------------|
| Trimming                    | skewer                            | 0.2.2        | -m pe                                                                      | Filter rawdata                 |
| QC                          | fastqc                            | v0.11.5      |                                                                            |                                |
| mapping                     | BWA                               | 0.7.12-r1039 | -T 25 -k 18                                                                | Mapped to the reference genome |
| correlation between samples | deepTools                         | 3.0.2        | --corMethod pearson                                                        |                                |
| peak calling                | MACS2                             | 2.1.2        | -q 0.05 --call-summits --nomodel --shift -100 --extsize 200 --keep-dup all |                                |
| Identification of motif     | homer<br>findMotifsGenome.pl      | v4.9.1       | -gc -len 8,10,12,14                                                        |                                |
| GO enrichment               | Goseq, topGO, Bioconductor (2.13) | 4.10.2       | corrected pvalue<0.05                                                      |                                |
| KEGG enrichment             | KOBAS                             | 3            | corrected pvalue<0.05                                                      |                                |

**Data S1. (separate file) - (GEO accession: GSE253761) ATAC-seq excel file HUVEC shScr vs. shAmotL2 peak comparison**

**Data S2. (separate file) - (GEO accession: GSE253761) ATAC-seq excel file HUVEC shScr vs. shAmotL2 peak down related genes**

## Major Resources Table

In order to allow validation and replication of experiments, all essential research materials listed in the Methods should be included in the Major Resources Table below. Authors are encouraged to use public repositories for protocols, data, code, and other materials and provide persistent identifiers and/or links to repositories when available. Authors may add or delete rows as needed.

### Animals (in vivo studies)

| Species      | Vendor or Source                                                  | Background Strain | Sex     | Persistent ID / URL |
|--------------|-------------------------------------------------------------------|-------------------|---------|---------------------|
| Mus musculus | Jackson Laboratory, Taconics Inc. or as otherwise specified below | C57BL/6J          | M and F |                     |

### Genetically Modified Animals

|                                                           | Species      | Vendor or Source                                                                                                                | Background Strain | Other Information                                                                                                                                   | Persistent ID / URL |
|-----------------------------------------------------------|--------------|---------------------------------------------------------------------------------------------------------------------------------|-------------------|-----------------------------------------------------------------------------------------------------------------------------------------------------|---------------------|
| <i>Wwtr1 flox/flox; Yap flox/flox x Cdh5(BAC)-CreERT2</i> | Mus musculus | <i>Wwtr1 flox/flox; Yap flox/flox</i> - Jackson Laboratory<br><br><i>Cdh5(BAC)-CreERT2</i> – Ref.(18)                           | C57BL/6J          | <i>Wwtr1 flox/flox; Yap flox/flox</i> mice (Jackson Laboratory) were crossed to <i>Cdh5(BAC)-CreERT2</i> transgenic mice                            |                     |
| <i>amotl2 flox/flox x Cdh5(PAC)-CreERT2 x ROSA26-EYFP</i> | Mus musculus | <i>amotl2 flox/flox</i> – Taconics Inc<br><br><i>Cdh5(PAC)-CreERT2</i> – Ref. (19)<br><br><i>ROSA26-EYFP</i> Jackson Laboratory | C57BL/6J          | <i>amotl2 flox/flox</i> mice with loxP-flanked <i>amotl2</i> gene, were crossed with <i>Cdh5(PAC)-CreERT</i> and <i>ROSA26-EYFP</i> transgenic mice |                     |

## Antibodies

| Target antigen                  | Vendor or Source             | Catalog #           | Working concentration     | Persistent ID / URL                                                                                                                                                                                                                                                                                                                         |
|---------------------------------|------------------------------|---------------------|---------------------------|---------------------------------------------------------------------------------------------------------------------------------------------------------------------------------------------------------------------------------------------------------------------------------------------------------------------------------------------|
| Rabbit pAb anti-AmotL2          | Innovagen, Lund, Sweden      | Ref. 21             | 1:100 (IF)<br>1:1000 (WB) | Ref. 21                                                                                                                                                                                                                                                                                                                                     |
| Rabbit mAb Anti-YAP             | Cell Signalling Technologies | D8H1X;<br>#14074    | 1:100 (IF)<br>1:1000 (WB) | <a href="https://www.cellsignal.com/products/primary-antibodies/yap-d8h1x-xp-rabbit-mab/14074">https://www.cellsignal.com/products/primary-antibodies/yap-d8h1x-xp-rabbit-mab/14074</a>                                                                                                                                                     |
| Rabbit mAb anti-pYAP Ser127     | Cell Signalling Technologies | D9W2I;<br>#13008    | 1:1000 (WB)               | <a href="https://www.cellsignal.com/products/primary-antibodies/phospho-yap-ser127-d9w2i-rabbit-mab/13008">https://www.cellsignal.com/products/primary-antibodies/phospho-yap-ser127-d9w2i-rabbit-mab/13008</a>                                                                                                                             |
| rabbit mAb anti-TAZ             | Cell Signalling Technologies | E8E9G;<br>#83669    | 1:1000 (WB)               | <a href="https://www.cellsignal.com/products/primary-antibodies/taz-e8e9g-rabbit-mab/83669">https://www.cellsignal.com/products/primary-antibodies/taz-e8e9g-rabbit-mab/83669</a>                                                                                                                                                           |
| Mouse anti-GAPDH                | Abcam                        | ab181602            | 1:5000 (WB)               | <a href="https://www.abcam.com/products/primary-antibodies/gapdh-antibody-epr16891-loading-control-ab181602.html">https://www.abcam.com/products/primary-antibodies/gapdh-antibody-epr16891-loading-control-ab181602.html</a>                                                                                                               |
| rabbit anti-FAK (phosphor Y397) | Abcam                        | ab81298             | 1:1000 (WB)               | <a href="https://www.abcam.com/products/primary-antibodies/fak-phospho-y397-antibody-ep2160y-ab81298.html">https://www.abcam.com/products/primary-antibodies/fak-phospho-y397-antibody-ep2160y-ab81298.html</a>                                                                                                                             |
| Mouse anti-Lamin A/C            | Santa Cruz Biotechnology     | sc-7292;<br>636     | 1:1000 (WB)<br>1:200 (IF) | <a href="https://www.scbt.com/p/lamin-a-c-antibody-636?requestFrom=search">https://www.scbt.com/p/lamin-a-c-antibody-636?requestFrom=search</a>                                                                                                                                                                                             |
| Mouse anti-YAP/TAZ              | Santa Cruz Biotechnology     | sc-101199;<br>63.7  | 1:100 (IF)<br>1:1000 (WB) | <a href="https://www.scbt.com/p/yap-antibody-63-7?requestFrom=search">https://www.scbt.com/p/yap-antibody-63-7?requestFrom=search</a>                                                                                                                                                                                                       |
| rabbit pAb anti-ki67            | Abcam                        | ab15580             | 1:100 (IF)                | <a href="https://www.abcam.com/products/primary-antibodies/ki67-antibody-ab15580.html">https://www.abcam.com/products/primary-antibodies/ki67-antibody-ab15580.html</a>                                                                                                                                                                     |
| rabbit pAb anti-VE-cadherin     | Abcam                        | ab33168             | 1:250 (IF)                | <a href="https://www.abcam.com/products/primary-antibodies/ve-cadherin-antibody-intercellular-junction-marker-ab33168.html">https://www.abcam.com/products/primary-antibodies/ve-cadherin-antibody-intercellular-junction-marker-ab33168.html</a>                                                                                           |
| chicken pAb anti-GFP            | Abcam                        | ab13970             | 1:200 (IF)                | <a href="https://www.abcam.com/products/primary-antibodies/gfp-antibody-ab13970.html">https://www.abcam.com/products/primary-antibodies/gfp-antibody-ab13970.html</a>                                                                                                                                                                       |
| goat pAb anti-GFP               | Abcam                        | ab6673              | 1:200 (IF)                | <a href="https://www.abcam.com/products/primary-antibodies/gfp-antibody-ab6673.html">https://www.abcam.com/products/primary-antibodies/gfp-antibody-ab6673.html</a>                                                                                                                                                                         |
| rabbit anti-ERG mAb             | Abcam                        | ab92513             | 1:200 (IF)                | <a href="https://www.abcam.com/products/primary-antibodies/erg-antibody-epr3864-ab92513.html">https://www.abcam.com/products/primary-antibodies/erg-antibody-epr3864-ab92513.html</a>                                                                                                                                                       |
| Rat anti-Cd31                   | BD Biosciences               | MEC 13.3;<br>553370 | 1:100 (IF)                | <a href="https://wwwbdbiosciences.com/en-de/products/reagents/flow-cytometry-reagents/research-reagents/single-color-antibodies-ruo/purified-rat-anti-mouse-cd31.553370">https://wwwbdbiosciences.com/en-de/products/reagents/flow-cytometry-reagents/research-reagents/single-color-antibodies-ruo/purified-rat-anti-mouse-cd31.553370</a> |
| Rat anti-Cd144/VEcadherin       | BD Biosciences               | 1104.1;<br>555289   | 1:200 (IF)                | <a href="https://wwwbdbiosciences.com/en-de/products/reagents/functional-cell-based-reagents/purified-rat-anti-mouse-cd144.555289">https://wwwbdbiosciences.com/en-de/products/reagents/functional-cell-based-reagents/purified-rat-anti-mouse-cd144.555289</a>                                                                             |

|                                 |                |           |             |                                                                                                                                                                                                                                                                                                             |
|---------------------------------|----------------|-----------|-------------|-------------------------------------------------------------------------------------------------------------------------------------------------------------------------------------------------------------------------------------------------------------------------------------------------------------|
| Mouse anti-prelamin A           | Sigma          | PL-1C7    | 1:100 (IF)  | <a href="https://www.sigmaaldrich.com/DE/de/product/mm/mabt858">https://www.sigmaaldrich.com/DE/de/product/mm/mabt858</a>                                                                                                                                                                                   |
| Mouse Anti-TEAD1 mAb            | BD Biosciences | 610923    | 1:100 (PLA) | <a href="https://www.bdbiosciences.com/en-de/products/reagents/microscopy-imaging-reagents/immunofluorescence-reagents/purified-mouse-anti-tef-1.610923">https://www.bdbiosciences.com/en-de/products/reagents/microscopy-imaging-reagents/immunofluorescence-reagents/purified-mouse-anti-tef-1.610923</a> |
| RNA pol II mAb                  | Active Motif   | 39097     |             | <a href="https://www.activemotif.com/catalog/details/39097/rna-pol-ii-antibody-mab">https://www.activemotif.com/catalog/details/39097/rna-pol-ii-antibody-mab</a>                                                                                                                                           |
| Histone H3K27me3 pAb            | Active Motif   | 39155     |             | <a href="https://www.activemotif.com/catalog/details/39155/histone-h3-trimethyl-lys27-antibody-pab">https://www.activemotif.com/catalog/details/39155/histone-h3-trimethyl-lys27-antibody-pab</a>                                                                                                           |
| Mouse IgG                       | Sigma          | I8765     |             | <a href="https://www.sigmaaldrich.com/DE/de/product/sigma/i8765">https://www.sigmaaldrich.com/DE/de/product/sigma/i8765</a>                                                                                                                                                                                 |
| Rabbit IgG                      | Diagenode      | C15410206 |             | <a href="https://www.diagenode.com/en/p/rabbit-igg-250-ug-250-ul">https://www.diagenode.com/en/p/rabbit-igg-250-ug-250-ul</a>                                                                                                                                                                               |
| Anti-Histone H3 (acetyl K27)    | Abcam          | ab4729    |             | <a href="https://www.abcam.com/products/primary-antibodies/histone-h3-acetyl-k27-antibody-chip-grade-ab4729.html">https://www.abcam.com/products/primary-antibodies/histone-h3-acetyl-k27-antibody-chip-grade-ab4729.html</a>                                                                               |
| anti-Histone H3 (tri methyl K4) | Abcam          | ab8580    |             | <a href="https://www.abcam.com/products/primary-antibodies/histone-h3-trimethyl-k4-antibody-chip-grade-ab8580.html">https://www.abcam.com/products/primary-antibodies/histone-h3-trimethyl-k4-antibody-chip-grade-ab8580.html</a>                                                                           |
| TexasRed phalloidin             | Invitrogen     | T7471     | 1:200 (IF)  | <a href="https://www.thermofisher.com/order/catalog/product/T7471?SID=srch-srp-T7471">https://www.thermofisher.com/order/catalog/product/T7471?SID=srch-srp-T7471</a>                                                                                                                                       |
| phalloidin-Atto 647N            | Sigma          | 65906     | 1:200 (IF)  | <a href="https://www.sigmaaldrich.com/DE/de/product/sigma/65906">https://www.sigmaaldrich.com/DE/de/product/sigma/65906</a>                                                                                                                                                                                 |

### Cultured Cells

| Name  | Vendor or Source | Sex (F, M, or unknown) | Persistent ID / URL                                                                                                                                                       |
|-------|------------------|------------------------|---------------------------------------------------------------------------------------------------------------------------------------------------------------------------|
| HUVEC | Promocell        | Unknown                | <a href="https://promocell.com/product/human-umbilical-vein-endothelial-cells-huvec/">https://promocell.com/product/human-umbilical-vein-endothelial-cells-huvec/</a>     |
| HUAEC | Promocell        | Unknown                | <a href="https://promocell.com/product/human-umbilical-artery-endothelial-cells-huaec/">https://promocell.com/product/human-umbilical-artery-endothelial-cells-huaec/</a> |

### Data & Code Availability

| Description                                                                   | Source / Repository                                                                                              | Persistent ID / URL        |
|-------------------------------------------------------------------------------|------------------------------------------------------------------------------------------------------------------|----------------------------|
| Data S1. ATAC-seq excel file HUVEC shScr vs. shAmotL2 peak comparison         | <a href="https://www.ncbi.nlm.nih.gov/geo/">https://www.ncbi.nlm.nih.gov/geo/</a><br>GEO gene expression omnibus | (GEO accession: GSE253761) |
| Data S2. ATAC-seq excel file HUVEC shScr vs. shAmotL2 peak down related genes | <a href="https://www.ncbi.nlm.nih.gov/geo/">https://www.ncbi.nlm.nih.gov/geo/</a><br>GEO gene expression omnibus | (GEO accession: GSE253761) |
| ATACseq raw data files for HUVEC and HUAEC shScr vs. shAmotL2                 | <a href="https://www.ncbi.nlm.nih.gov/geo/">https://www.ncbi.nlm.nih.gov/geo/</a><br>GEO gene expression omnibus | (GEO accession: GSE253761) |

## ARRIVE GUIDELINES

The ARRIVE guidelines (<https://arriveguidelines.org/>) are a checklist of recommendations to improve the reporting of research involving animals. Key elements of the study design should be included below to better enable readers to scrutinize the research adequately, evaluate its methodological rigor, and reproduce the methods or findings.

### Study Design

| Groups                                                                                                                                 | Sex                   | Age        | Number (prior to experiment) | Number (after termination) | Littermates (Yes/No) | Other description                                                                                                                                                                                                                                                                                       |
|----------------------------------------------------------------------------------------------------------------------------------------|-----------------------|------------|------------------------------|----------------------------|----------------------|---------------------------------------------------------------------------------------------------------------------------------------------------------------------------------------------------------------------------------------------------------------------------------------------------------|
| Yap/Taz WT<br><i>Wwtr1 flox/flox</i> ;<br><i>Yap flox/flox</i> -<br><i>Cre</i> -negative                                               | Male<br>and<br>female | 8<br>weeks | Total: 21                    | Total: 21                  | Yes                  | To induce endothelial-specific Yap/Taz gene inactivation, tamoxifen (Sigma, T5648) in corn oil (Sigma, C8267) was administered by oral gavage for 5 continuous days in 8-week-old mice (2 mg/mouse/day).                                                                                                |
| Yap/Taz iΔEC-<br><i>Wwtr1 flox/flox</i> ;<br><i>Yap flox/flox</i> ;<br><i>Cdh5(BAC)</i> -<br><i>CreERT2</i> – <i>Cre</i> -<br>positive | Male<br>and<br>female | 8<br>weeks | Total: 20                    | Total: 20                  | Yes                  | To induce endothelial-specific Yap/Taz gene inactivation, tamoxifen (Sigma, T5648) in corn oil (Sigma, C8267) was administered by oral gavage for 5 continuous days in 8-week-old mice (2 mg/mouse/day).                                                                                                |
| AmotL2 WT -<br><i>amotl2 flox/flox</i> x<br><i>Cdh5(PAC)</i> -<br><i>CreERT2</i> x<br><i>ROSA26-EYFP</i><br>( <i>Cre</i> - negative)   | Male<br>and<br>female | 6<br>weeks | Total: 12                    | Total: 12                  | Yes                  | To induce endothelial-specific <i>amotl2</i> deletion, tamoxifen was administered by intraperitoneal (IP) injection for 5 continuous days. For adult mice over 6 weeks old, 100μl of tamoxifen (20mg/ml) was administered and analysis of aortic samples was performed four weeks following injections. |

|                                                                                                                                        |                       |            |           |           |     |                                                                                                                                                                                                                                                                                                         |
|----------------------------------------------------------------------------------------------------------------------------------------|-----------------------|------------|-----------|-----------|-----|---------------------------------------------------------------------------------------------------------------------------------------------------------------------------------------------------------------------------------------------------------------------------------------------------------|
| AmotL2 iΔEC -<br><i>amotl2 flox/flox x</i><br><i>Cdh5(PAC)-</i><br><i>CreERT2 x</i><br><i>ROSA26-EYFP-</i><br>( <i>Cre</i> - positive) | Male<br>and<br>female | 6<br>weeks | Total: 14 | Total: 14 | Yes | To induce endothelial-specific <i>amotl2</i> deletion, tamoxifen was administered by intraperitoneal (IP) injection for 5 continuous days. For adult mice over 6 weeks old, 100μl of tamoxifen (20mg/ml) was administered and analysis of aortic samples was performed four weeks following injections. |
| <i>CreERT2 x</i><br><i>ROSA26-EYFP-</i><br>( <i>Cre</i> - positive)                                                                    | Male<br>and<br>female | 6<br>weeks | Total: 3  | Total: 3  | Yes | Tamoxifen was administered by intraperitoneal (IP) injection for 5 continuous days. For adult mice over 6 weeks old, 100μl of tamoxifen (20mg/ml) was administered and analysis of aortic samples was performed four weeks following injections.                                                        |

**Sample Size:** Sample size was determined by assessment of similar research in the literature and adopting similar n per sample group.

**Inclusion Criteria** – By genotyping, *Cre* positive or negative

**Exclusion Criteria** - By genotyping, *Cre* positive or negative

**Randomization** - None

**Blinding** - None
